# Supplementary material
Source: publisher figshare collection journal article supplement (https://acs.figshare.com/ndownloader/files/4492141)
Supplement: Supplementary file 1 [file 4492141]

# CIF-file generated for Tsuno Ru-Cl
 
#==============================================================================
data_global
#==============================================================================
 
# 0. AUDIT DETAILS
 
_audit_creation_date                 'Jul 22 11:17:30 2008'
_audit_creation_method               'PLATON <TABLE ACC> option'
_audit_update_record
;
;
 
#===============================================================================
 
# 1. SUBMISSION DETAILS
 
_publ_contact_author_name           # Name of author for correspondence
;
;
_publ_contact_author_address        # address of author for correspondence
;
;
 
_publ_contact_author_email           ?
_publ_contact_author_fax             ?
_publ_contact_author_phone           ?
 
_publ_requested_journal              'Acta Crystallographica C'
# Publication choise FI, CI or EI for Inorganic
#                    FM, CM or EM for Metal-organic
#                    FO, CO or EO for Organic
_publ_requested_category             ?
_publ_requested_coeditor_name        ?
 
_publ_contact_letter                # Include date of submission
;
Date of submission ?
 
Please consider this CIF submission for publication as a
Regular Structural Paper in Acta Crystallographica C.
;
 
#===============================================================================
 
# 2. PROCESSING SUMMARY (JOURNAL OFFICE ONLY)
 
_journal_date_recd_electronic        ?
 
_journal_date_to_coeditor            ?
_journal_date_from_coeditor          ?
_journal_date_accepted               ?
 
_journal_date_printers_first         ?
_journal_date_printers_final         ?
_journal_date_proofs_out             ?
_journal_date_proofs_in              ?
 
_journal_coeditor_name               ?
_journal_coeditor_code               ?
_journal_coeditor_notes
;
;
 
_journal_techeditor_code             ?
_journal_techeditor_notes
;
;
 
_journal_coden_ASTM                  ?
_journal_name_full                   ?
_journal_year                        ?
_journal_volume                      ?
_journal_issue                       ?
_journal_page_first                  ?
_journal_page_last                   ?
 
 
_journal_suppl_publ_number           ?
_journal_suppl_publ_pages            ?
 
 
#===============================================================================
 
# 3. TITLE AND AUTHOR LIST
 
_publ_section_title
;
;
_publ_section_title_footnote
;
;
 
# The loop structure below should contain the names and adresses of all
# authors, in the required order of publication. Repeat as necessary.
 
 
loop_
_publ_author_name
_publ_author_footnote
_publ_author_address
'?' # author name
;   # author related footnote
;
;   # Address of this author
;
 
#===============================================================================
 
# 4. TEXT
 
_publ_section_synopsis
;
 ?
;
_publ_section_abstract
;
 ?
;
 
# Insert blank lines between paragraphs
 
_publ_section_comment
;
;
_publ_section_exptl_prep
;
 ?
;
_publ_section_exptl_refinement
;
 The data were collected at 110K using an Oxford Diffraction Cryojet 
Cooler. The structure was solved by direct methods (SIR-97) 
and refined by full-matrix anisotropic least squares (SHELXL97).  
The H-atoms were calculated geometrically and a riding model was used 
during refinement process.
;
 
# Insert blank lines between references
 
_publ_section_references
;
  Altomare, A., Burla, M.C., Camalli, M., Cascarano, G.L., Giacovazzo, C.
   Guagliardi, A., Moliterni, A.G.G., Polidori, G. & Spagna, R.
   (1999) J. Appl. Cryst. 32, 115-119.

 Cosier, J. & Glazer, A.M. (1986). J. Appl. Cryst. 19, 105-107.

 Flack, H.D. (1983). Acta Cryst. A39, 876-881.

 L. J. Farrugia, J. Appl. Cryst (1997), 30, 565. 

 Sheldrick, G.M. SHELXL97 (1997). Program for crystal structure
   refinement. University of G\\"ottingen, Germany.
 
 Sheldrick, G.M. SHELXS97 (1997). Program for Crystal Structure
   solution. University of G\\"ottingen, Germany.
 
 Sluis, P. van der & Spek, A.L. (1990). Acta Cryst. A46, 194-201.

 Spek, A.L. (2003). J. Appl. Cryst. 36, 7-13.
 
 Wilson, A.J.C. (1992) Ed. International Tables for Crystallography,
   Volume C, Kluwer Academic Publishers, Dordrecht, The Netherlands.

;
_publ_section_acknowledgements
;
;
_publ_section_figure_captions
; View of the title compound with the atom numbering scheme.
Displacement ellipsoids for non-H atoms are drawn at the 50% probability level.
;
 
#===============================================================================
 
data_h141
 
#===============================================================================
 
# 5. CHEMICAL DATA
 
_chemical_name_systematic
;
;
_chemical_name_common                ?
_chemical_melting_point              ?
_chemical_formula_moiety
'C33 H33 Cl P2 Ru'
# Ex: 'C12 H16 N2 O6, H2 O' and '(Cd 2+)3, (C6 N6 Cr 3-)2, 2(H2 O)'
_chemical_formula_structural         ?
_chemical_formula_sum
'C66 H66 CL2 P4 RU2'
_chemical_formula_iupac              ?
_chemical_formula_weight                628.05
_chemical_compound_source           'see text'
 
loop_
_atom_type_symbol
_atom_type_description
_atom_type_scat_dispersion_real
_atom_type_scat_dispersion_imag
_atom_type_scat_source
Ru  Ru    0.0552    3.2960
 'International Tables Vol C Tables 4.2.6.8 and 6.1.1.4'
 P   P    0.2955    0.4335
 'International Tables Vol C Tables 4.2.6.8 and 6.1.1.4'
Cl  Cl    0.3639    0.7018
 'International Tables Vol C Tables 4.2.6.8 and 6.1.1.4'
 H   H    0.0000    0.0000
 'International Tables Vol C Tables 4.2.6.8 and 6.1.1.4'
 C   C    0.0181    0.0091
 'International Tables Vol C Tables 4.2.6.8 and 6.1.1.4'
 
#===============================================================================
 
# 6. CRYSTAL DATA
 
_symmetry_cell_setting                 Monoclinic
_symmetry_space_group_name_Hall      'P 2yb'
_symmetry_space_group_name_H-M       'P 21'
_symmetry_Int_Tables_number                  4
 
loop_
_symmetry_equiv_pos_site_id
_symmetry_equiv_pos_as_xyz
   1 x,y,z
   2 -x,1/2+y,-z
 
_cell_length_a                           9.4176(2)
_cell_length_b                          15.3229(3)
_cell_length_c                          19.8384(4)
_cell_angle_alpha                               90
_cell_angle_beta                         99.227(2)
_cell_angle_gamma                               90
_cell_volume                           2825.74(10)
_cell_formula_units_Z                    4
_cell_measurement_temperature          110
_cell_measurement_reflns_used   10092
_cell_measurement_theta_min     2.2550
_cell_measurement_theta_max     66.2934
_cell_special_details
;
;
 
_exptl_crystal_description          'plate'
_exptl_crystal_colour               'yellow'
 
_exptl_crystal_size_max                  0.220
_exptl_crystal_size_mid                  0.190
_exptl_crystal_size_min                  0.100
_exptl_crystal_size_rad              ?
_exptl_crystal_density_meas          ?
_exptl_crystal_density_diffrn            1.476
_exptl_crystal_density_method       'Not Measured'
_exptl_crystal_F_000                      1288
_exptl_absorpt_coefficient_mu            6.581
_exptl_crystal_density_meas_temp     ?
 
# Permitted for 
# analytical     'analytical from crystal shape'
#                Example: de Meulenaer&Tompa: ABST
# cylinder       'cylindrical'
# gaussian       'Gaussian from crystal shape'
#                Example: PLATON/ABSG
# integration    'integration from crystal shape'
# multi-scan     'symmetry-related measurements'
#                Example: SADABS, MULABS
# none           'no absorption corr. applied'
# numerical      'numerical from crystal shape'
# psi-scan       'psi-scan corrections'
#                Example: PLATON/ABSP
# refdelf        'refined from delta-F'
#                Example: SHELXA, DIFABS, DELABS
# sphere         'spherical'
#                Example: PLATON/ABSS
_exptl_absorpt_correction_type            'multi-scan'
_exptl_absorpt_process_details
;
CrysAlis RED, Oxford Diffraction Ltd.,
Version 1.171.32.15 (release 10-01-2008 CrysAlis171 .NET)
Empirical absorption correction using spherical harmonics,
 implemented in SCALE3 ABSPACK scaling algorithm.
;

_exptl_absorpt_correction_T_min                   0.61915
_exptl_absorpt_correction_T_max                   1.00000
 
#===============================================================================
 
# 7. EXPERIMENTAL DATA
 
_exptl_special_details
;
;
_diffrn_ambient_temperature            110
_diffrn_radiation_wavelength           1.54184
_diffrn_radiation_probe              'x-ray'
_diffrn_radiation_type               'CuK\a'
_diffrn_radiation_source 'Enhance (Cu) X-ray Source'
_diffrn_radiation_monochromator 'mirror'
 
_diffrn_measurement_device_type      'Oxford Diffraction Gemini Ultra'
_diffrn_measurement_method           'omega-scan'
_diffrn_measurement_details
;
#__ type_ start__ end____ width___ exp.time_
  1 omega  -45.00   13.00   1.0000    1.5000
omega____ theta____ kappa____ phi______ omega'___ theta'___ frames
    -      -11.6137   77.0000  270.0000    0.0000    0.0000 58

#__ type_ start__ end____ width___ exp.time_
  2 omega  -14.00   39.00   1.0000    1.5000
omega____ theta____ kappa____ phi______ omega'___ theta'___ frames
    -       11.6137  -45.0000   90.0000    0.0000    0.0000 53

#__ type_ start__ end____ width___ exp.time_
  3 omega  -67.00   -9.00   1.0000    1.5000
omega____ theta____ kappa____ phi______ omega'___ theta'___ frames
    -       11.6137  -77.0000    0.0000    0.0000    0.0000 58

#__ type_ start__ end____ width___ exp.time_
  4 omega   40.00  101.00   1.0000    1.5000
omega____ theta____ kappa____ phi______ omega'___ theta'___ frames
    -       11.6137    0.0000  270.0000    0.0000    0.0000 61

#__ type_ start__ end____ width___ exp.time_
  5 omega   -7.00   42.00   1.0000    1.5000
omega____ theta____ kappa____ phi______ omega'___ theta'___ frames
    -       11.6137  -63.0000   58.0000    0.0000    0.0000 49

#__ type_ start__ end____ width___ exp.time_
  6 omega -115.00  -62.00   1.0000    1.5000
omega____ theta____ kappa____ phi______ omega'___ theta'___ frames
    -      -90.0000  -45.0000  240.0000    0.0000    0.0000 53

#__ type_ start__ end____ width___ exp.time_
  7 omega -166.00  -58.00   1.0000    1.5000
omega____ theta____ kappa____ phi______ omega'___ theta'___ frames
    -      -90.0000  -71.0000  213.0000    0.0000    0.0000 108

#__ type_ start__ end____ width___ exp.time_
  8 omega -114.00  -61.00   1.0000    1.5000
omega____ theta____ kappa____ phi______ omega'___ theta'___ frames
    -      -90.0000  -77.0000  240.0000    0.0000    0.0000 53

#__ type_ start__ end____ width___ exp.time_
  9 omega -165.00 -111.00   1.0000    1.5000
omega____ theta____ kappa____ phi______ omega'___ theta'___ frames
    -      -90.0000  -45.0000   60.0000    0.0000    0.0000 54

#__ type_ start__ end____ width___ exp.time_
 10 omega -175.00 -117.00   1.0000    1.5000
omega____ theta____ kappa____ phi______ omega'___ theta'___ frames
    -      -90.0000    0.0000   60.0000    0.0000    0.0000 58

#__ type_ start__ end____ width___ exp.time_
 11 omega -113.00  -59.00   1.0000    1.5000
omega____ theta____ kappa____ phi______ omega'___ theta'___ frames
    -      -90.0000  -63.0000   58.0000    0.0000    0.0000 54

#__ type_ start__ end____ width___ exp.time_
 12 omega   20.00  121.00   1.0000    1.5000
omega____ theta____ kappa____ phi______ omega'___ theta'___ frames
    -       93.5000  -45.0000  210.0000    0.0000    0.0000 101

#__ type_ start__ end____ width___ exp.time_
 13 omega    4.00   64.00   1.0000    1.5000
omega____ theta____ kappa____ phi______ omega'___ theta'___ frames
    -       93.5000    0.0000    0.0000    0.0000    0.0000 60

#__ type_ start__ end____ width___ exp.time_
 14 omega   69.00  126.00   1.0000    1.5000
omega____ theta____ kappa____ phi______ omega'___ theta'___ frames
    -       93.5000  -77.0000  120.0000    0.0000    0.0000 57

#__ type_ start__ end____ width___ exp.time_
 15 omega   68.00  121.00   1.0000    1.5000
omega____ theta____ kappa____ phi______ omega'___ theta'___ frames
    -       93.5000  -45.0000  270.0000    0.0000    0.0000 53

#__ type_ start__ end____ width___ exp.time_
 16 omega   61.00  117.00   1.0000    1.5000
omega____ theta____ kappa____ phi______ omega'___ theta'___ frames
    -       93.5000   71.0000  146.0000    0.0000    0.0000 56

#__ type_ start__ end____ width___ exp.time_
 17 omega    4.00   62.00   1.0000    1.5000
omega____ theta____ kappa____ phi______ omega'___ theta'___ frames
    -       93.5000    0.0000   60.0000    0.0000    0.0000 58

#__ type_ start__ end____ width___ exp.time_
 18 omega    9.00   64.00   1.0000    1.5000
omega____ theta____ kappa____ phi______ omega'___ theta'___ frames
    -       93.5000    0.0000  300.0000    0.0000    0.0000 55

#__ type_ start__ end____ width___ exp.time_
 19 omega  114.00  147.00   1.0000    1.5000
omega____ theta____ kappa____ phi______ omega'___ theta'___ frames
    -       93.5000   77.0000   90.0000    0.0000    0.0000 33

#__ type_ start__ end____ width___ exp.time_
 20 omega   29.00  123.00   1.0000    1.5000
omega____ theta____ kappa____ phi______ omega'___ theta'___ frames
    -       93.5000  -71.0000   33.0000    0.0000    0.0000 94

#__ type_ start__ end____ width___ exp.time_
 21 omega   34.00   70.00   1.0000    1.5000
omega____ theta____ kappa____ phi______ omega'___ theta'___ frames
    -       93.5000  -45.0000   30.0000    0.0000    0.0000 36

#__ type_ start__ end____ width___ exp.time_
 22 omega   72.00  107.00   1.0000    1.5000
omega____ theta____ kappa____ phi______ omega'___ theta'___ frames
    -       93.5000   45.0000   60.0000    0.0000    0.0000 35

#__ type_ start__ end____ width___ exp.time_
 23 omega  121.00  162.00   1.0000    1.5000
omega____ theta____ kappa____ phi______ omega'___ theta'___ frames
    -       93.5000   71.0000  343.0000    0.0000    0.0000 41

;
_diffrn_detector_area_resol_mean 10.5431
 
_diffrn_standards_number             0
_diffrn_standards_interval_count     .
_diffrn_standards_interval_time      .
_diffrn_standards_decay_%            0
 
loop_
_diffrn_standard_refln_index_h
_diffrn_standard_refln_index_k
_diffrn_standard_refln_index_l
 ? ? ?
 
# number of measured reflections (redundant set)
_diffrn_reflns_number                22037
_diffrn_reflns_av_R_equivalents       0.0443
_diffrn_reflns_av_sigmaI/netI         0.0449
_diffrn_reflns_limit_h_min             -11
_diffrn_reflns_limit_h_max              10
_diffrn_reflns_limit_k_min             -18
_diffrn_reflns_limit_k_max              18
_diffrn_reflns_limit_l_min             -23
_diffrn_reflns_limit_l_max              23
_diffrn_reflns_theta_min              2.26
_diffrn_reflns_theta_max             66.44
_diffrn_reflns_theta_full            66.44
_diffrn_measured_fraction_theta_max  0.981
_diffrn_measured_fraction_theta_full 0.981
_diffrn_reflns_reduction_process
;
;
 
# number of unique reflections
_reflns_number_total                    9598
# number of observed reflections (> n sig(I))
_reflns_number_gt                       8199
_reflns_threshold_expression         I>2\s(I)
 
_computing_data_collection
;
CrysAlis CCD, Oxford Diffraction Ltd.,
Version 1.171.32.15 (release 10-01-2008 CrysAlis171 .NET)
;
_computing_cell_refinement
;
CrysAlis RED, Oxford Diffraction Ltd.,
Version 1.171.32.15 (release 10-01-2008 CrysAlis171 .NET)
;
_computing_data_reduction
;
CrysAlis RED, Oxford Diffraction Ltd.,
Version 1.171.32.15 (release 10-01-2008 CrysAlis171 .NET)
;
_computing_structure_solution        'SIR-97 (Altomare, 1999)'
_computing_structure_refinement      'SHELXL-97 (Sheldrick, 1997)'
_computing_molecular_graphics        'PLATON (Spek, 1990)'
_computing_publication_material      'PLATON (Spek, 2003)'


 
#===============================================================================
 
# 8. REFINEMENT DATA
 
_refine_special_details
;
Refinement of F^2^ against ALL reflections.  The weighted R-factor wR and 
 goodness of fit S are based on F^2^, conventional R-factors R are based 
 on F, with F set to zero for negative F^2^. The threshold expression of 
 F^2^ > 2sigma(F^2^) is used only for calculating R-factors(gt) etc. and is 
 not relevant to the choice of reflections for refinement.  R-factors based 
 on F^2^ are statistically about twice as large as those based on F, and R- 
 factors based on ALL data will be even larger. 
;
_refine_ls_structure_factor_coef     Fsqd
_refine_ls_matrix_type               full
_refine_ls_weighting_scheme          'calc'
 
_refine_ls_weighting_details
'calc w=1/[\s^2^(Fo^2^)+(0.0641P)^2^+2.2878P] where P=(Fo^2^+2Fc^2^)/3'
_atom_sites_solution_primary        'direct'
_atom_sites_solution_secondary      'difmap'
_atom_sites_solution_hydrogens      'geom'
 
 
# Permitted for _refine_ls_hydrogen_treatment :
# refall  - refined all H parameters
# refxyz  - refined H coordinates only
# refU    - refined H U only
# noref   - no refinement of H parameters
# constr  - H parameters constrained
# mixed   - some constrained, some independent
# undef   - H-atom parameters not defined
_refine_ls_hydrogen_treatment       'mixed'
 
_refine_ls_extinction_method         'none'
_refine_ls_abs_structure_details
 'Flack H.D. (1983), Acta Cryst. A39, 876-881'
_refine_ls_abs_structure_Flack             0.000(12)
 
# Permitted for _chemical_absolute_configuration:
# Absolute configuration details
# rm   = Det. by chiral ref. mol. with known abs.conf
# ad   = Det. by anomalous dispersion
# rmad = Det. by 'rm' and 'ad'
# syn  = Det. with reference to synthesis
# unk  = Unknown/Arbitrary
_chemical_absolute_configuration     ?
 
_refine_ls_number_reflns                  9598
_refine_ls_number_parameters               667
_refine_ls_number_restraints                 1
_refine_ls_number_constraints        ?
_refine_ls_R_factor_all                 0.0539
_refine_ls_R_factor_gt                  0.0423
_refine_ls_wR_factor_ref                0.1093
_refine_ls_wR_factor_gt                 0.1039
_refine_ls_goodness_of_fit_ref           1.039
_refine_ls_restrained_S_all              1.039
_refine_ls_shift/su_max                  0.001
_refine_ls_shift/su_mean                 0.000
_refine_diff_density_max                 1.105
_refine_diff_density_min                -0.880
_refine_diff_density_rms                 0.086
 
#===============================================================================
 
# 9. ATOMIC COORDINATES AND DISPLACEMENT PARAMETERS
 
loop_
_atom_site_label
_atom_site_type_symbol
_atom_site_thermal_displace_type
_atom_site_fract_x
_atom_site_fract_y
_atom_site_fract_z
_atom_site_occupancy
_atom_site_U_iso_or_equiv
_atom_site_calc_flag
_atom_site_refinement_flags
Ru1 Ru Uani 0.70173(6) 0.04494(3) 0.59734(2) 1.000 0.0231(2) . .
Cl1 Cl Uani 0.4666(2) 0.08615(14) 0.62308(9) 1.000 0.0275(5) . .
P1 P Uani 0.6144(2) -0.09252(15) 0.58217(9) 1.000 0.0238(6) . .
P2 P Uani 0.7783(2) 0.01950(14) 0.71128(8) 1.000 0.0235(6) . .
C1 C Uani 0.7247(10) 0.1714(6) 0.5427(4) 1.000 0.033(3) . .
C2 C Uani 0.8568(9) 0.1504(6) 0.5810(4) 1.000 0.032(3) . .
C3 C Uani 0.9025(9) 0.0696(6) 0.5590(4) 1.000 0.031(3) . .
C4 C Uani 0.7943(8) 0.0391(7) 0.5040(3) 1.000 0.029(2) . .
C5 C Uani 0.6821(9) 0.1017(6) 0.4939(3) 1.000 0.034(3) . .
C6 C Uani 0.5231(8) -0.1347(5) 0.6511(4) 1.000 0.029(2) . .
C7 C Uani 0.6251(8) -0.1394(6) 0.7191(4) 1.000 0.030(2) . .
C8 C Uani 0.6628(8) -0.0509(6) 0.7564(3) 1.000 0.033(2) . .
C9 C Uani 0.4448(9) -0.2212(6) 0.6326(4) 1.000 0.061(3) . .
C10 C Uani 0.4773(8) -0.1000(6) 0.5047(4) 1.000 0.030(3) . .
C11 C Uani 0.3338(8) -0.0783(6) 0.5074(4) 1.000 0.036(3) . .
C12 C Uani 0.2332(10) -0.0782(7) 0.4480(5) 1.000 0.043(3) . .
C13 C Uani 0.2729(10) -0.0979(7) 0.3868(4) 1.000 0.045(3) . .
C14 C Uani 0.4137(9) -0.1183(6) 0.3834(4) 1.000 0.040(3) . .
C15 C Uani 0.5147(8) -0.1196(5) 0.4428(3) 1.000 0.027(2) . .
C16 C Uani 0.7391(8) -0.1791(6) 0.5701(3) 1.000 0.028(2) . .
C17 C Uani 0.8886(9) -0.1646(7) 0.5886(4) 1.000 0.032(2) . .
C18 C Uani 0.9866(10) -0.2270(7) 0.5820(4) 1.000 0.042(3) . .
C19 C Uani 0.9417(10) -0.3085(7) 0.5551(4) 1.000 0.043(3) . .
C20 C Uani 0.8002(12) -0.3248(7) 0.5351(4) 1.000 0.047(3) . .
C21 C Uani 0.6983(10) -0.2591(6) 0.5422(4) 1.000 0.036(3) . .
C22 C Uani 0.7913(8) 0.1161(6) 0.7670(3) 1.000 0.025(2) . .
C23 C Uani 0.7205(9) 0.1924(6) 0.7460(4) 1.000 0.032(2) . .
C24 C Uani 0.7223(9) 0.2629(6) 0.7901(4) 1.000 0.035(3) . .
C25 C Uani 0.7972(9) 0.2591(6) 0.8550(4) 1.000 0.032(3) . .
C26 C Uani 0.8731(8) 0.1836(6) 0.8770(3) 1.000 0.029(2) . .
C27 C Uani 0.8685(9) 0.1122(6) 0.8345(3) 1.000 0.034(2) . .
C28 C Uani 0.9583(8) -0.0283(6) 0.7348(3) 1.000 0.024(2) . .
C29 C Uani 1.0727(8) 0.0172(6) 0.7147(4) 1.000 0.032(3) . .
C30 C Uani 1.2100(9) -0.0164(7) 0.7258(4) 1.000 0.039(3) . .
C31 C Uani 1.2360(10) -0.0956(8) 0.7592(4) 1.000 0.047(3) . .
C32 C Uani 1.1254(10) -0.1388(7) 0.7794(4) 1.000 0.044(3) . .
C33 C Uani 0.9877(9) -0.1062(6) 0.7684(4) 1.000 0.034(3) . .
Ru2 Ru Uani 0.30849(6) -0.53850(3) 0.90802(2) 1.000 0.0232(2) . .
Cl2 Cl Uani 0.5472(2) -0.57563(15) 0.88371(9) 1.000 0.0305(6) . .
P3 P Uani 0.2358(2) -0.51122(14) 0.79386(8) 1.000 0.0235(6) . .
P4 P Uani 0.3882(2) -0.40068(16) 0.92538(9) 1.000 0.0260(6) . .
C34 C Uani 0.1046(9) -0.5662(6) 0.9447(4) 1.000 0.032(3) . .
C35 C Uani 0.2084(8) -0.5368(7) 1.0001(3) 1.000 0.034(2) . .
C36 C Uani 0.3258(9) -0.5959(6) 1.0122(3) 1.000 0.033(3) . .
C37 C Uani 0.2940(9) -0.6642(6) 0.9629(4) 1.000 0.030(3) . .
C38 C Uani 0.1584(9) -0.6490(6) 0.9235(4) 1.000 0.034(3) . .
C39 C Uani 0.3631(7) -0.4413(6) 0.7570(3) 1.000 0.027(2) . .
C40 C Uani 0.3910(9) -0.3522(6) 0.7903(4) 1.000 0.035(3) . .
C41 C Uani 0.4857(9) -0.3518(6) 0.8609(4) 1.000 0.037(3) . .
C42 C Uani 0.3367(8) -0.4357(5) 0.6779(3) 1.000 0.046(3) . .
C43 C Uani 0.2204(8) -0.6058(6) 0.7364(4) 1.000 0.028(2) . .
C44 C Uani 0.1297(8) -0.6064(5) 0.6734(3) 1.000 0.031(2) . .
C45 C Uani 0.1286(9) -0.6754(7) 0.6287(4) 1.000 0.038(3) . .
C46 C Uani 0.2160(8) -0.7465(6) 0.6465(4) 1.000 0.033(3) . .
C47 C Uani 0.3048(9) -0.7487(6) 0.7096(4) 1.000 0.033(2) . .
C48 C Uani 0.3056(9) -0.6775(6) 0.7546(4) 1.000 0.031(2) . .
C49 C Uani 0.0562(8) -0.4651(6) 0.7714(3) 1.000 0.025(2) . .
C50 C Uani 0.0251(8) -0.3831(6) 0.7380(3) 1.000 0.027(2) . .
C51 C Uani -0.1144(9) -0.3522(6) 0.7241(4) 1.000 0.033(3) . .
C52 C Uani -0.2266(10) -0.3999(7) 0.7438(4) 1.000 0.044(3) . .
C53 C Uani -0.1983(10) -0.4814(6) 0.7744(4) 1.000 0.040(3) . .
C54 C Uani -0.0590(8) -0.5128(6) 0.7875(3) 1.000 0.032(3) . .
C55 C Uani 0.2537(10) -0.3146(6) 0.9351(4) 1.000 0.031(3) . .
C56 C Uani 0.1098(9) -0.3333(7) 0.9170(4) 1.000 0.037(3) . .
C57 C Uani 0.0050(10) -0.2681(8) 0.9219(4) 1.000 0.047(3) . .
C58 C Uani 0.0492(12) -0.1873(9) 0.9432(4) 1.000 0.061(4) . .
C59 C Uani 0.1956(13) -0.1681(7) 0.9615(4) 1.000 0.053(4) . .
C60 C Uani 0.2993(12) -0.2300(7) 0.9574(4) 1.000 0.047(3) . .
C61 C Uani 0.5194(9) -0.3893(6) 1.0035(4) 1.000 0.033(3) . .
C62 C Uani 0.4762(10) -0.3648(7) 1.0667(4) 1.000 0.042(3) . .
C63 C Uani 0.5750(10) -0.3608(7) 1.1246(4) 1.000 0.051(3) . .
C64 C Uani 0.7187(10) -0.3828(7) 1.1246(4) 1.000 0.047(3) . .
C65 C Uani 0.7604(10) -0.4077(7) 1.0638(5) 1.000 0.051(3) . .
C66 C Uani 0.6596(9) -0.4124(7) 1.0035(4) 1.000 0.046(3) . .
H1A H Uiso 0.67090 0.22280 0.54760 1.000 0.0400 calc R
H2A H Uiso 0.90820 0.18520 0.61640 1.000 0.0390 calc R
H3A H Uiso 0.98900 0.04010 0.57710 1.000 0.0380 calc R
H4A H Uiso 0.79780 -0.01360 0.47910 1.000 0.0350 calc R
H5A H Uiso 0.59610 0.09880 0.46160 1.000 0.0410 calc R
H6 H Uiso 0.44730 -0.09100 0.65730 1.000 0.0340 calc R
H7A H Uiso 0.71580 -0.16710 0.71100 1.000 0.0350 calc R
H7B H Uiso 0.58150 -0.17820 0.75010 1.000 0.0350 calc R
H8A H Uiso 0.71320 -0.06260 0.80320 1.000 0.0400 calc R
H8B H Uiso 0.57270 -0.01940 0.76010 1.000 0.0400 calc R
H9A H Uiso 0.38940 -0.23720 0.66850 1.000 0.0730 calc R
H9B H Uiso 0.51540 -0.26700 0.62820 1.000 0.0730 calc R
H9C H Uiso 0.37950 -0.21470 0.58910 1.000 0.0730 calc R
H11 H Uiso 0.30530 -0.06370 0.54980 1.000 0.0440 calc R
H12 H Uiso 0.13570 -0.06430 0.45020 1.000 0.0510 calc R
H13 H Uiso 0.20340 -0.09750 0.34650 1.000 0.0540 calc R
H14 H Uiso 0.44190 -0.13160 0.34060 1.000 0.0470 calc R
H15 H Uiso 0.61160 -0.13440 0.44020 1.000 0.0320 calc R
H17 H Uiso 0.92100 -0.10930 0.60640 1.000 0.0380 calc R
H18 H Uiso 1.08620 -0.21540 0.59550 1.000 0.0510 calc R
H19 H Uiso 1.01080 -0.35250 0.55100 1.000 0.0520 calc R
H20 H Uiso 0.76950 -0.38000 0.51630 1.000 0.0570 calc R
H21 H Uiso 0.59910 -0.27060 0.52740 1.000 0.0430 calc R
H23 H Uiso 0.66970 0.19680 0.70070 1.000 0.0390 calc R
H24 H Uiso 0.67090 0.31440 0.77490 1.000 0.0420 calc R
H25 H Uiso 0.79750 0.30750 0.88490 1.000 0.0380 calc R
H26 H Uiso 0.92820 0.18140 0.92150 1.000 0.0350 calc R
H27 H Uiso 0.91740 0.06010 0.85040 1.000 0.0410 calc R
H29 H Uiso 1.05550 0.07230 0.69300 1.000 0.0380 calc R
H30 H Uiso 1.28650 0.01450 0.71060 1.000 0.0470 calc R
H31 H Uiso 1.33050 -0.11920 0.76780 1.000 0.0560 calc R
H32 H Uiso 1.14310 -0.19330 0.80200 1.000 0.0530 calc R
H33 H Uiso 0.91250 -0.13770 0.78400 1.000 0.0410 calc R
H34A H Uiso 0.01790 -0.53770 0.92560 1.000 0.0390 calc R
H35A H Uiso 0.20040 -0.48490 1.02540 1.000 0.0410 calc R
H36A H Uiso 0.40890 -0.59110 1.04620 1.000 0.0390 calc R
H37A H Uiso 0.35490 -0.71230 0.95760 1.000 0.0360 calc R
H38A H Uiso 0.11020 -0.68640 0.88900 1.000 0.0410 calc R
H39 H Uiso 0.45730 -0.47240 0.76830 1.000 0.0330 calc R
H40A H Uiso 0.29720 -0.32550 0.79470 1.000 0.0420 calc R
H40B H Uiso 0.43710 -0.31470 0.75940 1.000 0.0420 calc R
H41A H Uiso 0.51310 -0.29100 0.87410 1.000 0.0440 calc R
H41B H Uiso 0.57480 -0.38530 0.85890 1.000 0.0440 calc R
H42A H Uiso 0.41990 -0.40830 0.66240 1.000 0.0550 calc R
H42B H Uiso 0.25050 -0.40060 0.66260 1.000 0.0550 calc R
H42C H Uiso 0.32300 -0.49450 0.65860 1.000 0.0550 calc R
H44 H Uiso 0.06740 -0.55820 0.66100 1.000 0.0370 calc R
H45 H Uiso 0.06750 -0.67390 0.58570 1.000 0.0460 calc R
H46 H Uiso 0.21560 -0.79410 0.61570 1.000 0.0400 calc R
H47 H Uiso 0.36450 -0.79780 0.72230 1.000 0.0400 calc R
H48 H Uiso 0.36560 -0.67910 0.79790 1.000 0.0370 calc R
H50 H Uiso 0.10110 -0.34950 0.72510 1.000 0.0320 calc R
H51 H Uiso -0.13380 -0.29810 0.70110 1.000 0.0400 calc R
H52 H Uiso -0.32170 -0.37720 0.73640 1.000 0.0520 calc R
H53 H Uiso -0.27500 -0.51540 0.78630 1.000 0.0480 calc R
H54 H Uiso -0.04160 -0.56860 0.80810 1.000 0.0390 calc R
H56 H Uiso 0.08050 -0.39000 0.90110 1.000 0.0440 calc R
H57 H Uiso -0.09460 -0.28100 0.91040 1.000 0.0560 calc R
H58 H Uiso -0.02010 -0.14290 0.94580 1.000 0.0740 calc R
H59 H Uiso 0.22390 -0.11110 0.97700 1.000 0.0640 calc R
H60 H Uiso 0.39860 -0.21650 0.96920 1.000 0.0560 calc R
H62 H Uiso 0.37830 -0.35140 1.06830 1.000 0.0510 calc R
H63 H Uiso 0.54560 -0.34260 1.16600 1.000 0.0610 calc R
H64 H Uiso 0.78640 -0.38060 1.16560 1.000 0.0560 calc R
H65 H Uiso 0.85820 -0.42190 1.06270 1.000 0.0610 calc R
H66 H Uiso 0.68910 -0.43170 0.96240 1.000 0.0550 calc R
 
loop_
_atom_site_aniso_label
_atom_site_aniso_U_11
_atom_site_aniso_U_22
_atom_site_aniso_U_33
_atom_site_aniso_U_23
_atom_site_aniso_U_13
_atom_site_aniso_U_12
Ru1 0.0308(3) 0.0192(4) 0.0186(2) -0.0009(2) 0.0023(2) -0.0026(3)
Cl1 0.0316(9) 0.0235(11) 0.0272(8) -0.0037(7) 0.0041(7) 0.0026(8)
P1 0.0288(10) 0.0172(11) 0.0250(8) -0.0036(7) 0.0027(7) 0.0006(8)
P2 0.0318(10) 0.0199(13) 0.0185(8) -0.0016(7) 0.0031(7) -0.0043(8)
C1 0.054(5) 0.017(5) 0.030(4) 0.003(3) 0.009(4) -0.005(4)
C2 0.047(5) 0.027(5) 0.021(3) 0.000(3) 0.003(3) -0.015(4)
C3 0.033(4) 0.037(6) 0.027(4) 0.007(3) 0.014(3) -0.008(4)
C4 0.041(4) 0.029(5) 0.019(3) 0.002(4) 0.011(3) 0.005(4)
C5 0.045(5) 0.035(6) 0.019(3) 0.011(3) -0.001(3) -0.007(4)
C6 0.033(4) 0.017(4) 0.039(4) -0.006(3) 0.016(3) -0.001(3)
C7 0.036(4) 0.026(5) 0.030(3) 0.000(3) 0.014(3) -0.004(3)
C8 0.046(4) 0.029(5) 0.028(3) -0.014(3) 0.015(3) -0.008(4)
C9 0.067(6) 0.068(6) 0.049(5) 0.011(4) 0.013(4) -0.015(5)
C10 0.033(4) 0.020(5) 0.034(4) -0.005(3) -0.005(3) 0.002(3)
C11 0.033(4) 0.025(5) 0.051(4) -0.011(3) 0.007(3) -0.001(3)
C12 0.028(4) 0.033(5) 0.063(5) -0.013(4) -0.004(4) 0.006(4)
C13 0.046(5) 0.045(6) 0.039(4) -0.002(4) -0.012(4) 0.000(4)
C14 0.046(5) 0.037(5) 0.032(4) -0.002(3) -0.004(3) -0.004(4)
C15 0.032(4) 0.019(4) 0.028(3) 0.000(3) 0.002(3) -0.003(3)
C16 0.026(4) 0.035(5) 0.021(3) 0.001(3) -0.002(3) 0.006(4)
C17 0.035(4) 0.036(5) 0.024(3) -0.001(3) 0.003(3) -0.002(4)
C18 0.040(5) 0.058(7) 0.030(4) 0.008(4) 0.008(4) 0.018(5)
C19 0.068(6) 0.040(6) 0.024(4) 0.002(4) 0.013(4) 0.033(5)
C20 0.083(7) 0.028(6) 0.026(4) -0.012(4) -0.006(4) 0.018(5)
C21 0.047(5) 0.022(5) 0.034(4) -0.009(4) -0.007(4) 0.005(4)
C22 0.030(4) 0.026(5) 0.020(3) -0.005(3) 0.008(3) -0.001(3)
C23 0.045(4) 0.023(4) 0.024(3) 0.006(3) -0.007(3) -0.001(3)
C24 0.044(4) 0.028(5) 0.031(4) -0.001(3) 0.002(3) 0.006(4)
C25 0.043(4) 0.025(5) 0.026(4) -0.006(3) 0.002(3) -0.004(4)
C26 0.039(4) 0.032(5) 0.016(3) -0.007(3) 0.003(3) 0.000(4)
C27 0.041(4) 0.034(5) 0.024(3) 0.000(3) -0.004(3) -0.006(4)
C28 0.039(4) 0.015(4) 0.016(3) 0.001(3) 0.000(3) 0.004(4)
C29 0.038(4) 0.024(5) 0.032(4) 0.007(3) 0.002(3) 0.006(4)
C30 0.029(4) 0.053(7) 0.038(4) 0.005(4) 0.016(3) 0.010(4)
C31 0.045(5) 0.059(8) 0.038(4) 0.007(5) 0.009(4) 0.028(5)
C32 0.060(6) 0.039(6) 0.029(4) 0.009(4) -0.004(4) 0.014(5)
C33 0.047(5) 0.031(5) 0.021(3) 0.011(3) -0.004(3) -0.007(4)
Ru2 0.0289(3) 0.0191(4) 0.0210(3) -0.0012(2) 0.0025(2) 0.0013(3)
Cl2 0.0313(9) 0.0291(12) 0.0296(8) -0.0044(7) 0.0001(7) 0.0053(8)
P3 0.0267(9) 0.0222(13) 0.0205(8) -0.0007(7) 0.0006(7) 0.0038(8)
P4 0.0313(10) 0.0236(13) 0.0216(8) -0.0015(8) -0.0002(8) -0.0016(9)
C34 0.034(4) 0.030(6) 0.033(4) 0.006(3) 0.008(4) -0.010(4)
C35 0.045(4) 0.033(5) 0.028(3) -0.001(4) 0.017(3) -0.014(5)
C36 0.053(5) 0.025(5) 0.019(3) 0.006(3) 0.004(3) 0.001(4)
C37 0.037(4) 0.022(5) 0.030(4) 0.010(3) 0.005(3) -0.002(3)
C38 0.040(5) 0.031(5) 0.030(4) 0.004(3) 0.005(3) -0.010(4)
C39 0.029(3) 0.036(5) 0.016(3) 0.003(3) 0.000(2) -0.003(3)
C40 0.049(5) 0.028(5) 0.027(4) 0.003(3) 0.001(4) -0.012(4)
C41 0.043(4) 0.041(6) 0.024(3) 0.006(3) -0.002(3) -0.014(4)
C42 0.050(4) 0.054(5) 0.035(4) -0.006(3) 0.007(3) -0.007(4)
C43 0.033(4) 0.027(5) 0.025(3) 0.004(3) 0.006(3) 0.002(4)
C44 0.036(4) 0.023(5) 0.029(3) -0.008(3) -0.005(3) 0.017(4)
C45 0.045(5) 0.042(6) 0.023(3) 0.000(4) -0.010(3) 0.002(4)
C46 0.039(4) 0.031(5) 0.028(4) -0.014(3) 0.003(3) 0.003(4)
C47 0.040(4) 0.028(5) 0.028(3) -0.006(3) -0.003(3) 0.009(3)
C48 0.036(4) 0.029(5) 0.027(3) -0.006(3) -0.001(3) 0.004(3)
C49 0.033(4) 0.026(5) 0.016(3) -0.003(3) 0.002(3) 0.008(4)
C50 0.028(4) 0.025(5) 0.026(3) -0.009(3) 0.002(3) 0.004(3)
C51 0.043(5) 0.021(5) 0.036(4) 0.004(3) 0.007(4) 0.008(4)
C52 0.035(5) 0.050(7) 0.047(5) 0.005(5) 0.007(4) 0.011(5)
C53 0.047(5) 0.028(6) 0.044(4) 0.005(4) 0.004(4) -0.005(4)
C54 0.040(4) 0.031(6) 0.025(3) 0.001(3) 0.003(3) 0.004(4)
C55 0.054(5) 0.020(5) 0.019(3) -0.005(3) 0.006(3) 0.008(4)
C56 0.037(5) 0.040(6) 0.032(4) 0.003(4) 0.004(3) 0.022(4)
C57 0.047(5) 0.061(8) 0.031(4) 0.000(5) 0.004(4) 0.022(5)
C58 0.086(8) 0.068(9) 0.029(4) 0.001(5) 0.007(5) 0.041(7)
C59 0.098(9) 0.027(6) 0.031(4) -0.003(4) -0.002(5) 0.018(6)
C60 0.073(7) 0.034(6) 0.028(4) 0.000(4) -0.007(4) 0.007(5)
C61 0.047(5) 0.018(5) 0.031(4) 0.003(3) -0.004(3) -0.009(4)
C62 0.043(5) 0.053(6) 0.030(4) -0.007(4) 0.004(3) -0.007(4)
C63 0.067(6) 0.059(7) 0.023(4) 0.000(4) -0.003(4) -0.020(5)
C64 0.058(6) 0.035(5) 0.039(4) -0.002(4) -0.019(4) -0.010(4)
C65 0.043(5) 0.036(6) 0.061(6) -0.002(5) -0.030(5) 0.002(4)
C66 0.054(5) 0.038(6) 0.037(4) -0.015(4) -0.016(4) 0.012(4)
 

 
_geom_special_details
;
 Bond distances, angles etc. have been calculated using the
 rounded fractional coordinates. All su's are estimated
 from the variances of the (full) variance-covariance matrix.
 The cell esds are taken into account in the estimation of
 distances, angles and torsion angles
;
 
loop_
_geom_bond_atom_site_label_1
_geom_bond_atom_site_label_2
_geom_bond_distance
_geom_bond_site_symmetry_1
_geom_bond_site_symmetry_2
_geom_bond_publ_flag
 Ru1     Cl1        2.434(2)                     .       .                   yes
 Ru1     P1         2.264(2)                     .       .                   yes
 Ru1     P2       2.2932(16)                     .       .                   yes
 Ru1     C1         2.248(9)                     .       .                   yes
 Ru1     C2         2.236(9)                     .       .                   yes
 Ru1     C3         2.181(9)                     .       .                   yes
 Ru1     C4         2.171(6)                     .       .                   yes
 Ru1     C5         2.209(7)                     .       .                   yes
 Ru2     C38        2.258(9)                     .       .                   yes
 Ru2     Cl2        2.441(2)                     .       .                   yes
 Ru2     P3       2.2968(16)                     .       .                   yes
 Ru2     P4         2.249(2)                     .       .                   yes
 Ru2     C34        2.201(9)                     .       .                   yes
 Ru2     C35        2.186(6)                     .       .                   yes
 Ru2     C36        2.228(7)                     .       .                   yes
 Ru2     C37        2.227(9)                     .       .                   yes
 P1      C10        1.846(8)                     .       .                   yes
 P1      C16        1.813(9)                     .       .                   yes
 P1      C6         1.845(8)                     .       .                   yes
 P2      C8         1.860(8)                     .       .                   yes
 P2      C22        1.840(8)                     .       .                   yes
 P2      C28        1.837(8)                     .       .                   yes
 P3      C39        1.844(8)                     .       .                   yes
 P3      C43        1.835(9)                     .       .                   yes
 P3      C49        1.821(8)                     .       .                   yes
 P4      C61        1.829(8)                     .       .                   yes
 P4      C55       1.860(10)                     .       .                   yes
 P4      C41        1.849(9)                     .       .                   yes
 C1      C5        1.454(12)                     .       .                   no
 C1      C2        1.388(12)                     .       .                   no
 C2      C3        1.403(13)                     .       .                   no
 C3      C4        1.446(11)                     .       .                   no
 C4      C5        1.417(13)                     .       .                   no
 C6      C9        1.533(12)                     .       .                   no
 C6      C7        1.527(11)                     .       .                   no
 C7      C8        1.558(12)                     .       .                   no
 C10     C11       1.401(11)                     .       .                   no
 C10     C15       1.364(10)                     .       .                   no
 C11     C12       1.389(12)                     .       .                   no
 C12     C13       1.360(13)                     .       .                   no
 C13     C14       1.375(13)                     .       .                   no
 C14     C15       1.391(10)                     .       .                   no
 C16     C17       1.414(11)                     .       .                   no
 C16     C21       1.374(13)                     .       .                   no
 C17     C18       1.350(14)                     .       .                   no
 C18     C19       1.397(15)                     .       .                   no
 C19     C20       1.351(15)                     .       .                   no
 C20     C21       1.413(14)                     .       .                   no
 C22     C27        1.419(9)                     .       .                   no
 C22     C23       1.377(12)                     .       .                   no
 C23     C24       1.389(12)                     .       .                   no
 C24     C25       1.367(11)                     .       .                   no
 C25     C26       1.393(12)                     .       .                   no
 C26     C27       1.378(12)                     .       .                   no
 C28     C29       1.394(11)                     .       .                   no
 C28     C33       1.374(12)                     .       .                   no
 C29     C30       1.376(12)                     .       .                   no
 C30     C31       1.386(15)                     .       .                   no
 C31     C32       1.348(14)                     .       .                   no
 C32     C33       1.374(13)                     .       .                   no
 C1      H1A          0.9500                     .       .                   no
 C2      H2A          0.9500                     .       .                   no
 C3      H3A          0.9500                     .       .                   no
 C4      H4A          0.9500                     .       .                   no
 C5      H5A          0.9500                     .       .                   no
 C6      H6           1.0000                     .       .                   no
 C7      H7B          0.9900                     .       .                   no
 C7      H7A          0.9900                     .       .                   no
 C8      H8A          0.9900                     .       .                   no
 C8      H8B          0.9900                     .       .                   no
 C9      H9A          0.9800                     .       .                   no
 C9      H9B          0.9800                     .       .                   no
 C9      H9C          0.9800                     .       .                   no
 C11     H11          0.9500                     .       .                   no
 C12     H12          0.9500                     .       .                   no
 C13     H13          0.9500                     .       .                   no
 C14     H14          0.9500                     .       .                   no
 C15     H15          0.9500                     .       .                   no
 C17     H17          0.9500                     .       .                   no
 C18     H18          0.9500                     .       .                   no
 C19     H19          0.9500                     .       .                   no
 C20     H20          0.9500                     .       .                   no
 C21     H21          0.9500                     .       .                   no
 C23     H23          0.9500                     .       .                   no
 C24     H24          0.9500                     .       .                   no
 C25     H25          0.9500                     .       .                   no
 C26     H26          0.9500                     .       .                   no
 C27     H27          0.9500                     .       .                   no
 C29     H29          0.9500                     .       .                   no
 C30     H30          0.9500                     .       .                   no
 C31     H31          0.9500                     .       .                   no
 C32     H32          0.9500                     .       .                   no
 C33     H33          0.9500                     .       .                   no
 C34     C35       1.422(11)                     .       .                   no
 C34     C38       1.453(13)                     .       .                   no
 C35     C36       1.420(13)                     .       .                   no
 C36     C37       1.431(12)                     .       .                   no
 C37     C38       1.406(12)                     .       .                   no
 C39     C40       1.521(12)                     .       .                   no
 C39     C42        1.551(8)                     .       .                   no
 C40     C41       1.535(11)                     .       .                   no
 C43     C44       1.396(10)                     .       .                   no
 C43     C48       1.374(12)                     .       .                   no
 C44     C45       1.379(12)                     .       .                   no
 C45     C46       1.377(13)                     .       .                   no
 C46     C47       1.390(11)                     .       .                   no
 C47     C48       1.409(12)                     .       .                   no
 C49     C50       1.429(12)                     .       .                   no
 C49     C54       1.387(11)                     .       .                   no
 C50     C51       1.382(12)                     .       .                   no
 C51     C52       1.391(13)                     .       .                   no
 C52     C53       1.395(14)                     .       .                   no
 C53     C54       1.382(12)                     .       .                   no
 C55     C56       1.375(13)                     .       .                   no
 C55     C60       1.414(14)                     .       .                   no
 C56     C57       1.419(15)                     .       .                   no
 C57     C58       1.352(18)                     .       .                   no
 C58     C59       1.400(16)                     .       .                   no
 C59     C60       1.373(16)                     .       .                   no
 C61     C62       1.429(12)                     .       .                   no
 C61     C66       1.367(12)                     .       .                   no
 C62     C63       1.359(12)                     .       .                   no
 C63     C64       1.395(14)                     .       .                   no
 C64     C65       1.381(13)                     .       .                   no
 C65     C66       1.405(13)                     .       .                   no
 C34     H34A         0.9500                     .       .                   no
 C35     H35A         0.9500                     .       .                   no
 C36     H36A         0.9500                     .       .                   no
 C37     H37A         0.9500                     .       .                   no
 C38     H38A         0.9500                     .       .                   no
 C39     H39          1.0000                     .       .                   no
 C40     H40A         0.9900                     .       .                   no
 C40     H40B         0.9900                     .       .                   no
 C41     H41A         0.9900                     .       .                   no
 C41     H41B         0.9900                     .       .                   no
 C42     H42A         0.9800                     .       .                   no
 C42     H42B         0.9800                     .       .                   no
 C42     H42C         0.9800                     .       .                   no
 C44     H44          0.9500                     .       .                   no
 C45     H45          0.9500                     .       .                   no
 C46     H46          0.9500                     .       .                   no
 C47     H47          0.9500                     .       .                   no
 C48     H48          0.9500                     .       .                   no
 C50     H50          0.9500                     .       .                   no
 C51     H51          0.9500                     .       .                   no
 C52     H52          0.9500                     .       .                   no
 C53     H53          0.9500                     .       .                   no
 C54     H54          0.9500                     .       .                   no
 C56     H56          0.9500                     .       .                   no
 C57     H57          0.9500                     .       .                   no
 C58     H58          0.9500                     .       .                   no
 C59     H59          0.9500                     .       .                   no
 C60     H60          0.9500                     .       .                   no
 C62     H62          0.9500                     .       .                   no
 C63     H63          0.9500                     .       .                   no
 C64     H64          0.9500                     .       .                   no
 C65     H65          0.9500                     .       .                   no
 C66     H66          0.9500                     .       .                   no
 
loop_
_geom_angle_atom_site_label_1
_geom_angle_atom_site_label_2
_geom_angle_atom_site_label_3
_geom_angle
_geom_angle_site_symmetry_1
_geom_angle_site_symmetry_2
_geom_angle_site_symmetry_3
_geom_angle_publ_flag
 Cl1     Ru1     P1         86.90(7)             .       .       .           yes
 Cl1     Ru1     P2         89.44(7)             .       .       .           yes
 Cl1     Ru1     C1          92.2(2)             .       .       .           yes
 Cl1     Ru1     C2         118.7(2)             .       .       .           yes
 Cl1     Ru1     C3         153.7(2)             .       .       .           yes
 Cl1     Ru1     C4         133.9(2)             .       .       .           yes
 Cl1     Ru1     C5          98.6(2)             .       .       .           yes
 P1      Ru1     P2         91.32(7)             .       .       .           yes
 P1      Ru1     C1         143.0(2)             .       .       .           yes
 P1      Ru1     C2         152.2(2)             .       .       .           yes
 P1      Ru1     C3         115.6(2)             .       .       .           yes
 P1      Ru1     C4          92.0(3)             .       .       .           yes
 P1      Ru1     C5         105.6(2)             .       .       .           yes
 P2      Ru1     C1         125.6(2)             .       .       .           yes
 P2      Ru1     C2          99.0(2)             .       .       .           yes
 P2      Ru1     C3         102.7(2)             .       .       .           yes
 P2      Ru1     C4         136.7(2)             .       .       .           yes
 P2      Ru1     C5         161.6(2)             .       .       .           yes
 C1      Ru1     C2          36.1(3)             .       .       .           yes
 C1      Ru1     C3          61.8(3)             .       .       .           yes
 C1      Ru1     C4          62.7(4)             .       .       .           yes
 C1      Ru1     C5          38.1(3)             .       .       .           yes
 C2      Ru1     C3          37.0(3)             .       .       .           yes
 C2      Ru1     C4          63.0(3)             .       .       .           yes
 C2      Ru1     C5          62.6(3)             .       .       .           yes
 C3      Ru1     C4          38.8(3)             .       .       .           yes
 C3      Ru1     C5          63.6(3)             .       .       .           yes
 C4      Ru1     C5          37.8(3)             .       .       .           yes
 C34     Ru2     C37         63.0(3)             .       .       .           yes
 C34     Ru2     C38         38.0(3)             .       .       .           yes
 C35     Ru2     C36         37.5(3)             .       .       .           yes
 C35     Ru2     C37         62.2(4)             .       .       .           yes
 C35     Ru2     C38         62.1(3)             .       .       .           yes
 C36     Ru2     C37         37.5(3)             .       .       .           yes
 C36     Ru2     C38         62.1(3)             .       .       .           yes
 C37     Ru2     C38         36.5(3)             .       .       .           yes
 P3      Ru2     C38        100.2(2)             .       .       .           yes
 P4      Ru2     C34        114.7(2)             .       .       .           yes
 P4      Ru2     C35         92.2(3)             .       .       .           yes
 Cl2     Ru2     P3         89.19(7)             .       .       .           yes
 Cl2     Ru2     P4         87.35(7)             .       .       .           yes
 Cl2     Ru2     C34        154.2(2)             .       .       .           yes
 Cl2     Ru2     C35        134.6(2)             .       .       .           yes
 Cl2     Ru2     C36         99.1(2)             .       .       .           yes
 Cl2     Ru2     C37         91.5(2)             .       .       .           yes
 Cl2     Ru2     C38        117.9(2)             .       .       .           yes
 P3      Ru2     P4         91.12(7)             .       .       .           yes
 P3      Ru2     C34        102.9(2)             .       .       .           yes
 P3      Ru2     C35        136.2(2)             .       .       .           yes
 P3      Ru2     C36        162.3(2)             .       .       .           yes
 P3      Ru2     C37        127.4(2)             .       .       .           yes
 C34     Ru2     C36         63.6(3)             .       .       .           yes
 P4      Ru2     C37        141.5(2)             .       .       .           yes
 P4      Ru2     C38        152.1(2)             .       .       .           yes
 P4      Ru2     C36        104.8(2)             .       .       .           yes
 C34     Ru2     C35         37.8(3)             .       .       .           yes
 Ru1     P1      C6         115.5(3)             .       .       .           yes
 Ru1     P1      C10        111.1(3)             .       .       .           yes
 Ru1     P1      C16        118.0(3)             .       .       .           yes
 C6      P1      C10        104.4(4)             .       .       .           yes
 C6      P1      C16        103.3(3)             .       .       .           yes
 C10     P1      C16        103.1(3)             .       .       .           yes
 C8      P2      C22         99.5(3)             .       .       .           yes
 C8      P2      C28        103.5(4)             .       .       .           yes
 Ru1     P2      C28        116.7(2)             .       .       .           yes
 Ru1     P2      C8         117.2(2)             .       .       .           yes
 Ru1     P2      C22        115.8(2)             .       .       .           yes
 C22     P2      C28        101.4(4)             .       .       .           yes
 Ru2     P3      C39        112.8(2)             .       .       .           yes
 Ru2     P3      C43        116.8(3)             .       .       .           yes
 C39     P3      C43        101.8(4)             .       .       .           yes
 C39     P3      C49        108.4(4)             .       .       .           yes
 Ru2     P3      C49        115.5(2)             .       .       .           yes
 C43     P3      C49        100.2(4)             .       .       .           yes
 Ru2     P4      C55        117.8(3)             .       .       .           yes
 Ru2     P4      C61        112.5(3)             .       .       .           yes
 C41     P4      C55        101.9(4)             .       .       .           yes
 C41     P4      C61        101.8(4)             .       .       .           yes
 C55     P4      C61        102.9(4)             .       .       .           yes
 Ru2     P4      C41        117.7(3)             .       .       .           yes
 Ru1     C1      C2          71.5(5)             .       .       .           yes
 Ru1     C1      C5          69.5(5)             .       .       .           yes
 C2      C1      C5         108.8(8)             .       .       .           no
 C1      C2      C3         109.1(8)             .       .       .           no
 Ru1     C2      C3          69.4(5)             .       .       .           yes
 Ru1     C2      C1          72.4(5)             .       .       .           yes
 Ru1     C3      C4          70.2(4)             .       .       .           yes
 Ru1     C3      C2          73.6(5)             .       .       .           yes
 C2      C3      C4         107.8(8)             .       .       .           no
 Ru1     C4      C3          71.0(4)             .       .       .           yes
 Ru1     C4      C5          72.6(4)             .       .       .           yes
 C3      C4      C5         107.9(8)             .       .       .           no
 Ru1     C5      C1          72.4(4)             .       .       .           yes
 Ru1     C5      C4          69.7(4)             .       .       .           yes
 C1      C5      C4         106.5(7)             .       .       .           no
 C7      C6      C9         112.4(7)             .       .       .           no
 P1      C6      C7         111.7(5)             .       .       .           yes
 P1      C6      C9         112.9(5)             .       .       .           yes
 C6      C7      C8         116.2(7)             .       .       .           no
 P2      C8      C7         112.5(5)             .       .       .           yes
 C11     C10     C15        118.5(7)             .       .       .           no
 P1      C10     C11        120.3(6)             .       .       .           yes
 P1      C10     C15        121.1(6)             .       .       .           yes
 C10     C11     C12        119.9(8)             .       .       .           no
 C11     C12     C13        120.6(9)             .       .       .           no
 C12     C13     C14        120.0(8)             .       .       .           no
 C13     C14     C15        119.7(7)             .       .       .           no
 C10     C15     C14        121.3(7)             .       .       .           no
 P1      C16     C17        119.3(7)             .       .       .           yes
 P1      C16     C21        124.1(6)             .       .       .           yes
 C17     C16     C21        116.6(8)             .       .       .           no
 C16     C17     C18        122.1(9)             .       .       .           no
 C17     C18     C19        120.0(9)             .       .       .           no
 C18     C19     C20        120.1(9)             .       .       .           no
 C19     C20     C21        119.5(9)             .       .       .           no
 C16     C21     C20        121.7(9)             .       .       .           no
 P2      C22     C27        120.5(7)             .       .       .           yes
 C23     C22     C27        118.1(8)             .       .       .           no
 P2      C22     C23        121.3(5)             .       .       .           yes
 C22     C23     C24        120.9(7)             .       .       .           no
 C23     C24     C25        120.9(8)             .       .       .           no
 C24     C25     C26        119.5(8)             .       .       .           no
 C25     C26     C27        120.2(6)             .       .       .           no
 C22     C27     C26        120.4(8)             .       .       .           no
 P2      C28     C29        116.9(6)             .       .       .           yes
 P2      C28     C33        125.2(6)             .       .       .           yes
 C29     C28     C33        117.9(7)             .       .       .           no
 C28     C29     C30        121.1(8)             .       .       .           no
 C29     C30     C31        119.6(8)             .       .       .           no
 C30     C31     C32        119.1(9)             .       .       .           no
 C31     C32     C33       121.9(10)             .       .       .           no
 C28     C33     C32        120.3(8)             .       .       .           no
 C2      C1      H1A          126.00             .       .       .           no
 C5      C1      H1A          126.00             .       .       .           no
 Ru1     C1      H1A          125.00             .       .       .           no
 C3      C2      H2A          125.00             .       .       .           no
 C1      C2      H2A          125.00             .       .       .           no
 Ru1     C2      H2A          124.00             .       .       .           no
 C2      C3      H3A          126.00             .       .       .           no
 Ru1     C3      H3A          122.00             .       .       .           no
 C4      C3      H3A          126.00             .       .       .           no
 C3      C4      H4A          126.00             .       .       .           no
 Ru1     C4      H4A          122.00             .       .       .           no
 C5      C4      H4A          126.00             .       .       .           no
 C1      C5      H5A          127.00             .       .       .           no
 Ru1     C5      H5A          123.00             .       .       .           no
 C4      C5      H5A          127.00             .       .       .           no
 C9      C6      H6           106.00             .       .       .           no
 P1      C6      H6           106.00             .       .       .           no
 C7      C6      H6           106.00             .       .       .           no
 C6      C7      H7B          108.00             .       .       .           no
 C8      C7      H7A          108.00             .       .       .           no
 C8      C7      H7B          108.00             .       .       .           no
 H7A     C7      H7B          107.00             .       .       .           no
 C6      C7      H7A          108.00             .       .       .           no
 P2      C8      H8A          109.00             .       .       .           no
 C7      C8      H8A          109.00             .       .       .           no
 C7      C8      H8B          109.00             .       .       .           no
 P2      C8      H8B          109.00             .       .       .           no
 H8A     C8      H8B          108.00             .       .       .           no
 C6      C9      H9A          110.00             .       .       .           no
 C6      C9      H9B          109.00             .       .       .           no
 C6      C9      H9C          109.00             .       .       .           no
 H9A     C9      H9B          109.00             .       .       .           no
 H9A     C9      H9C          109.00             .       .       .           no
 H9B     C9      H9C          109.00             .       .       .           no
 C12     C11     H11          120.00             .       .       .           no
 C10     C11     H11          120.00             .       .       .           no
 C13     C12     H12          120.00             .       .       .           no
 C11     C12     H12          120.00             .       .       .           no
 C12     C13     H13          120.00             .       .       .           no
 C14     C13     H13          120.00             .       .       .           no
 C13     C14     H14          120.00             .       .       .           no
 C15     C14     H14          120.00             .       .       .           no
 C10     C15     H15          119.00             .       .       .           no
 C14     C15     H15          119.00             .       .       .           no
 C16     C17     H17          119.00             .       .       .           no
 C18     C17     H17          119.00             .       .       .           no
 C19     C18     H18          120.00             .       .       .           no
 C17     C18     H18          120.00             .       .       .           no
 C20     C19     H19          120.00             .       .       .           no
 C18     C19     H19          120.00             .       .       .           no
 C19     C20     H20          120.00             .       .       .           no
 C21     C20     H20          120.00             .       .       .           no
 C16     C21     H21          119.00             .       .       .           no
 C20     C21     H21          119.00             .       .       .           no
 C24     C23     H23          120.00             .       .       .           no
 C22     C23     H23          119.00             .       .       .           no
 C23     C24     H24          120.00             .       .       .           no
 C25     C24     H24          120.00             .       .       .           no
 C24     C25     H25          120.00             .       .       .           no
 C26     C25     H25          120.00             .       .       .           no
 C27     C26     H26          120.00             .       .       .           no
 C25     C26     H26          120.00             .       .       .           no
 C22     C27     H27          120.00             .       .       .           no
 C26     C27     H27          120.00             .       .       .           no
 C28     C29     H29          119.00             .       .       .           no
 C30     C29     H29          120.00             .       .       .           no
 C31     C30     H30          120.00             .       .       .           no
 C29     C30     H30          120.00             .       .       .           no
 C32     C31     H31          120.00             .       .       .           no
 C30     C31     H31          121.00             .       .       .           no
 C31     C32     H32          119.00             .       .       .           no
 C33     C32     H32          119.00             .       .       .           no
 C32     C33     H33          120.00             .       .       .           no
 C28     C33     H33          120.00             .       .       .           no
 Ru2     C34     C35         70.5(4)             .       .       .           yes
 Ru2     C34     C38         73.1(5)             .       .       .           yes
 C35     C34     C38        105.8(7)             .       .       .           no
 Ru2     C35     C34         71.7(4)             .       .       .           yes
 Ru2     C35     C36         72.9(4)             .       .       .           yes
 C34     C35     C36        110.4(8)             .       .       .           no
 Ru2     C36     C35         69.6(4)             .       .       .           yes
 Ru2     C36     C37         71.3(4)             .       .       .           yes
 C35     C36     C37        106.2(7)             .       .       .           no
 Ru2     C37     C36         71.3(5)             .       .       .           yes
 Ru2     C37     C38         72.9(5)             .       .       .           yes
 C36     C37     C38        109.3(8)             .       .       .           no
 Ru2     C38     C34         68.9(5)             .       .       .           yes
 Ru2     C38     C37         70.6(5)             .       .       .           yes
 C34     C38     C37        108.2(7)             .       .       .           no
 P3      C39     C40        115.3(5)             .       .       .           yes
 P3      C39     C42        115.1(5)             .       .       .           yes
 C40     C39     C42        112.2(7)             .       .       .           no
 C39     C40     C41        115.8(7)             .       .       .           no
 P4      C41     C40        110.5(6)             .       .       .           yes
 P3      C43     C44        122.5(6)             .       .       .           yes
 P3      C43     C48        118.9(6)             .       .       .           yes
 C44     C43     C48        118.5(8)             .       .       .           no
 C43     C44     C45        121.4(7)             .       .       .           no
 C44     C45     C46        120.0(7)             .       .       .           no
 C45     C46     C47        119.9(8)             .       .       .           no
 C46     C47     C48        119.6(8)             .       .       .           no
 C43     C48     C47        120.6(7)             .       .       .           no
 P3      C49     C50        124.6(6)             .       .       .           yes
 P3      C49     C54        118.0(6)             .       .       .           yes
 C50     C49     C54        117.4(7)             .       .       .           no
 C49     C50     C51        120.8(7)             .       .       .           no
 C50     C51     C52        120.3(8)             .       .       .           no
 C51     C52     C53        119.5(9)             .       .       .           no
 C52     C53     C54        120.2(9)             .       .       .           no
 C49     C54     C53        121.8(8)             .       .       .           no
 P4      C55     C56        119.0(7)             .       .       .           yes
 P4      C55     C60        120.3(7)             .       .       .           yes
 C56     C55     C60        120.7(9)             .       .       .           no
 C55     C56     C57        120.2(9)             .       .       .           no
 C56     C57     C58        118.9(9)             .       .       .           no
 C57     C58     C59       121.0(11)             .       .       .           no
 C58     C59     C60       121.3(10)             .       .       .           no
 C55     C60     C59       117.9(10)             .       .       .           no
 P4      C61     C62        121.3(7)             .       .       .           yes
 P4      C61     C66        119.8(6)             .       .       .           yes
 C62     C61     C66        118.6(8)             .       .       .           no
 C61     C62     C63        120.1(9)             .       .       .           no
 C62     C63     C64        121.5(8)             .       .       .           no
 C63     C64     C65        118.6(8)             .       .       .           no
 C64     C65     C66        120.7(9)             .       .       .           no
 C61     C66     C65        120.5(8)             .       .       .           no
 Ru2     C34     H34A         121.00             .       .       .           no
 C35     C34     H34A         127.00             .       .       .           no
 C38     C34     H34A         127.00             .       .       .           no
 Ru2     C35     H35A         122.00             .       .       .           no
 C34     C35     H35A         125.00             .       .       .           no
 C36     C35     H35A         125.00             .       .       .           no
 Ru2     C36     H36A         124.00             .       .       .           no
 C35     C36     H36A         127.00             .       .       .           no
 C37     C36     H36A         127.00             .       .       .           no
 Ru2     C37     H37A         122.00             .       .       .           no
 C36     C37     H37A         125.00             .       .       .           no
 C38     C37     H37A         125.00             .       .       .           no
 Ru2     C38     H38A         126.00             .       .       .           no
 C34     C38     H38A         126.00             .       .       .           no
 C37     C38     H38A         126.00             .       .       .           no
 P3      C39     H39          104.00             .       .       .           no
 C40     C39     H39          104.00             .       .       .           no
 C42     C39     H39          104.00             .       .       .           no
 C39     C40     H40A         108.00             .       .       .           no
 C39     C40     H40B         108.00             .       .       .           no
 C41     C40     H40A         108.00             .       .       .           no
 C41     C40     H40B         108.00             .       .       .           no
 H40A    C40     H40B         108.00             .       .       .           no
 P4      C41     H41A         110.00             .       .       .           no
 P4      C41     H41B         110.00             .       .       .           no
 C40     C41     H41A         109.00             .       .       .           no
 C40     C41     H41B         109.00             .       .       .           no
 H41A    C41     H41B         108.00             .       .       .           no
 C39     C42     H42A         110.00             .       .       .           no
 C39     C42     H42B         110.00             .       .       .           no
 C39     C42     H42C         110.00             .       .       .           no
 H42A    C42     H42B         109.00             .       .       .           no
 H42A    C42     H42C         109.00             .       .       .           no
 H42B    C42     H42C         109.00             .       .       .           no
 C43     C44     H44          119.00             .       .       .           no
 C45     C44     H44          119.00             .       .       .           no
 C44     C45     H45          120.00             .       .       .           no
 C46     C45     H45          120.00             .       .       .           no
 C45     C46     H46          120.00             .       .       .           no
 C47     C46     H46          120.00             .       .       .           no
 C46     C47     H47          120.00             .       .       .           no
 C48     C47     H47          120.00             .       .       .           no
 C43     C48     H48          120.00             .       .       .           no
 C47     C48     H48          120.00             .       .       .           no
 C49     C50     H50          120.00             .       .       .           no
 C51     C50     H50          120.00             .       .       .           no
 C50     C51     H51          120.00             .       .       .           no
 C52     C51     H51          120.00             .       .       .           no
 C51     C52     H52          120.00             .       .       .           no
 C53     C52     H52          120.00             .       .       .           no
 C52     C53     H53          120.00             .       .       .           no
 C54     C53     H53          120.00             .       .       .           no
 C49     C54     H54          119.00             .       .       .           no
 C53     C54     H54          119.00             .       .       .           no
 C55     C56     H56          120.00             .       .       .           no
 C57     C56     H56          120.00             .       .       .           no
 C56     C57     H57          121.00             .       .       .           no
 C58     C57     H57          121.00             .       .       .           no
 C57     C58     H58          120.00             .       .       .           no
 C59     C58     H58          119.00             .       .       .           no
 C58     C59     H59          119.00             .       .       .           no
 C60     C59     H59          119.00             .       .       .           no
 C55     C60     H60          121.00             .       .       .           no
 C59     C60     H60          121.00             .       .       .           no
 C61     C62     H62          120.00             .       .       .           no
 C63     C62     H62          120.00             .       .       .           no
 C62     C63     H63          119.00             .       .       .           no
 C64     C63     H63          119.00             .       .       .           no
 C63     C64     H64          121.00             .       .       .           no
 C65     C64     H64          121.00             .       .       .           no
 C64     C65     H65          120.00             .       .       .           no
 C66     C65     H65          120.00             .       .       .           no
 C61     C66     H66          120.00             .       .       .           no
 C65     C66     H66          120.00             .       .       .           no
 
loop_
_geom_torsion_atom_site_label_1
_geom_torsion_atom_site_label_2
_geom_torsion_atom_site_label_3
_geom_torsion_atom_site_label_4
_geom_torsion
_geom_torsion_site_symmetry_1
_geom_torsion_site_symmetry_2
_geom_torsion_site_symmetry_3
_geom_torsion_site_symmetry_4
_geom_torsion_publ_flag
 Cl1     Ru1     P1      C6         -49.2(3)     .       .       .       .   no
 P2      Ru1     P1      C6          40.2(3)     .       .       .       .   no
 C1      Ru1     P1      C6        -138.8(5)     .       .       .       .   no
 C2      Ru1     P1      C6         152.5(5)     .       .       .       .   no
 C3      Ru1     P1      C6         144.9(4)     .       .       .       .   no
 C4      Ru1     P1      C6         177.0(3)     .       .       .       .   no
 C5      Ru1     P1      C6        -147.3(4)     .       .       .       .   no
 Cl1     Ru1     P1      C10         69.4(3)     .       .       .       .   no
 P2      Ru1     P1      C10        158.7(3)     .       .       .       .   no
 C1      Ru1     P1      C10        -20.2(5)     .       .       .       .   no
 C2      Ru1     P1      C10        -89.0(5)     .       .       .       .   no
 C3      Ru1     P1      C10        -96.5(4)     .       .       .       .   no
 C4      Ru1     P1      C10        -64.4(3)     .       .       .       .   no
 C5      Ru1     P1      C10        -28.7(4)     .       .       .       .   no
 Cl1     Ru1     P1      C16       -172.0(2)     .       .       .       .   no
 P2      Ru1     P1      C16        -82.7(2)     .       .       .       .   no
 C1      Ru1     P1      C16         98.4(5)     .       .       .       .   no
 C2      Ru1     P1      C16         29.6(5)     .       .       .       .   no
 C3      Ru1     P1      C16         22.1(3)     .       .       .       .   no
 C4      Ru1     P1      C16         54.2(3)     .       .       .       .   no
 C5      Ru1     P1      C16         89.9(3)     .       .       .       .   no
 Cl1     Ru1     P2      C8          50.3(3)     .       .       .       .   no
 P1      Ru1     P2      C8         -36.6(3)     .       .       .       .   no
 C1      Ru1     P2      C8         142.7(4)     .       .       .       .   no
 C2      Ru1     P2      C8         169.3(4)     .       .       .       .   no
 C3      Ru1     P2      C8        -153.2(4)     .       .       .       .   no
 C4      Ru1     P2      C8        -130.9(5)     .       .       .       .   no
 Cl1     Ru1     P2      C22        -66.8(3)     .       .       .       .   no
 P1      Ru1     P2      C22       -153.6(3)     .       .       .       .   no
 C1      Ru1     P2      C22         25.6(4)     .       .       .       .   no
 C2      Ru1     P2      C22         52.2(4)     .       .       .       .   no
 C3      Ru1     P2      C22         89.8(4)     .       .       .       .   no
 C4      Ru1     P2      C22        112.0(5)     .       .       .       .   no
 Cl1     Ru1     P2      C28        173.9(3)     .       .       .       .   no
 P1      Ru1     P2      C28         87.0(3)     .       .       .       .   no
 C1      Ru1     P2      C28        -93.8(4)     .       .       .       .   no
 C2      Ru1     P2      C28        -67.1(4)     .       .       .       .   no
 C3      Ru1     P2      C28        -29.6(4)     .       .       .       .   no
 C4      Ru1     P2      C28         -7.4(5)     .       .       .       .   no
 Cl1     Ru1     C1      C2         139.8(5)     .       .       .       .   no
 P1      Ru1     C1      C2        -132.5(4)     .       .       .       .   no
 P2      Ru1     C1      C2          48.9(6)     .       .       .       .   no
 C3      Ru1     C1      C2         -36.7(5)     .       .       .       .   no
 C4      Ru1     C1      C2         -80.8(5)     .       .       .       .   no
 C5      Ru1     C1      C2        -119.1(7)     .       .       .       .   no
 Cl1     Ru1     C1      C5        -101.1(5)     .       .       .       .   no
 P1      Ru1     C1      C5         -13.3(7)     .       .       .       .   no
 P2      Ru1     C1      C5         168.0(4)     .       .       .       .   no
 C2      Ru1     C1      C5         119.1(7)     .       .       .       .   no
 C3      Ru1     C1      C5          82.5(5)     .       .       .       .   no
 C4      Ru1     C1      C5          38.4(5)     .       .       .       .   no
 C2      Ru1     C3      C4        -116.4(7)     .       .       .       .   no
 C5      Ru1     C3      C4         -37.6(5)     .       .       .       .   no
 C5      Ru1     C2      C3         -81.7(5)     .       .       .       .   no
 C4      Ru1     C2      C1          80.0(5)     .       .       .       .   no
 C5      Ru1     C2      C1          37.4(5)     .       .       .       .   no
 Cl1     Ru1     C4      C3         142.2(4)     .       .       .       .   no
 Cl1     Ru1     C2      C1         -47.4(5)     .       .       .       .   no
 P1      Ru1     C2      C1         107.8(6)     .       .       .       .   no
 P2      Ru1     C2      C1        -141.7(5)     .       .       .       .   no
 C3      Ru1     C2      C1         119.1(7)     .       .       .       .   no
 C3      Ru1     C4      C5        -116.7(8)     .       .       .       .   no
 C4      Ru1     C3      C2         116.4(7)     .       .       .       .   no
 Cl1     Ru1     C2      C3        -166.5(4)     .       .       .       .   no
 P1      Ru1     C2      C3         -11.3(8)     .       .       .       .   no
 P2      Ru1     C2      C3          99.2(4)     .       .       .       .   no
 C1      Ru1     C2      C3        -119.1(7)     .       .       .       .   no
 C4      Ru1     C2      C3         -39.1(5)     .       .       .       .   no
 C1      Ru1     C3      C2          35.7(5)     .       .       .       .   no
 C1      Ru1     C4      C3          78.0(6)     .       .       .       .   no
 C5      Ru1     C3      C2          78.8(5)     .       .       .       .   no
 Cl1     Ru1     C5      C1          82.6(5)     .       .       .       .   no
 Cl1     Ru1     C3      C2          27.6(8)     .       .       .       .   no
 P1      Ru1     C3      C2         174.2(4)     .       .       .       .   no
 P2      Ru1     C3      C2         -88.1(4)     .       .       .       .   no
 C2      Ru1     C4      C5         -79.4(6)     .       .       .       .   no
 C2      Ru1     C5      C1         -35.4(5)     .       .       .       .   no
 C2      Ru1     C4      C3          37.3(5)     .       .       .       .   no
 Cl1     Ru1     C3      C4         -88.7(7)     .       .       .       .   no
 P1      Ru1     C3      C4          57.8(6)     .       .       .       .   no
 P2      Ru1     C3      C4         155.5(5)     .       .       .       .   no
 C1      Ru1     C3      C4         -80.7(6)     .       .       .       .   no
 P2      Ru1     C4      C3         -36.1(7)     .       .       .       .   no
 C3      Ru1     C5      C4          38.7(5)     .       .       .       .   no
 C3      Ru1     C5      C1         -77.1(5)     .       .       .       .   no
 C5      Ru1     C4      C3         116.7(8)     .       .       .       .   no
 Cl1     Ru1     C4      C5          25.5(7)     .       .       .       .   no
 P1      Ru1     C4      C5         113.1(5)     .       .       .       .   no
 P1      Ru1     C4      C3        -130.2(5)     .       .       .       .   no
 C1      Ru1     C4      C5         -38.7(5)     .       .       .       .   no
 Cl1     Ru1     C5      C4        -161.7(5)     .       .       .       .   no
 P1      Ru1     C5      C4         -72.5(5)     .       .       .       .   no
 C4      Ru1     C5      C1        -115.7(7)     .       .       .       .   no
 P1      Ru1     C5      C1         171.7(5)     .       .       .       .   no
 C2      Ru1     C5      C4          80.4(6)     .       .       .       .   no
 P2      Ru1     C4      C5        -152.8(4)     .       .       .       .   no
 C1      Ru1     C5      C4         115.7(7)     .       .       .       .   no
 C38     Ru2     P3      C49         68.3(4)     .       .       .       .   no
 C38     Ru2     P4      C55        -33.4(5)     .       .       .       .   no
 C34     Ru2     P3      C39        154.9(4)     .       .       .       .   no
 C37     Ru2     P3      C49         95.3(4)     .       .       .       .   no
 C35     Ru2     P3      C39        133.6(5)     .       .       .       .   no
 Cl2     Ru2     P4      C61        -70.3(3)     .       .       .       .   no
 P3      Ru2     P4      C61       -159.4(3)     .       .       .       .   no
 Cl2     Ru2     P3      C39        -48.1(3)     .       .       .       .   no
 C38     Ru2     C35     C34        -39.5(5)     .       .       .       .   no
 P3      Ru2     C34     C38         90.1(4)     .       .       .       .   no
 P4      Ru2     C34     C38       -172.6(4)     .       .       .       .   no
 C35     Ru2     C34     C38       -114.1(7)     .       .       .       .   no
 Cl2     Ru2     P4      C41         47.6(3)     .       .       .       .   no
 P4      Ru2     P3      C39         39.2(3)     .       .       .       .   no
 C37     Ru2     C35     C34        -81.0(6)     .       .       .       .   no
 P4      Ru2     C35     C34        129.2(5)     .       .       .       .   no
 C36     Ru2     C35     C34       -119.1(8)     .       .       .       .   no
 P3      Ru2     C37     C38        -48.8(6)     .       .       .       .   no
 P4      Ru2     C37     C38        133.6(4)     .       .       .       .   no
 Cl2     Ru2     C35     C36        -23.2(7)     .       .       .       .   no
 P3      Ru2     C35     C36        154.4(4)     .       .       .       .   no
 P4      Ru2     C35     C36       -111.7(5)     .       .       .       .   no
 C34     Ru2     C35     C36        119.1(8)     .       .       .       .   no
 C37     Ru2     C35     C36         38.1(5)     .       .       .       .   no
 C38     Ru2     C35     C36         79.7(6)     .       .       .       .   no
 C38     Ru2     P3      C39       -166.4(4)     .       .       .       .   no
 Cl2     Ru2     P3      C43         69.2(3)     .       .       .       .   no
 P4      Ru2     P3      C43        156.5(3)     .       .       .       .   no
 Cl2     Ru2     C36     C35        163.5(5)     .       .       .       .   no
 P4      Ru2     C36     C35         73.8(5)     .       .       .       .   no
 C34     Ru2     C36     C35        -36.7(5)     .       .       .       .   no
 C37     Ru2     C36     C35       -116.1(7)     .       .       .       .   no
 C38     Ru2     C36     C35        -79.6(6)     .       .       .       .   no
 Cl2     Ru2     C36     C37        -80.4(5)     .       .       .       .   no
 P4      Ru2     C36     C37       -170.1(4)     .       .       .       .   no
 C34     Ru2     C36     C37         79.4(5)     .       .       .       .   no
 C35     Ru2     C36     C37        116.1(7)     .       .       .       .   no
 C38     Ru2     C36     C37         36.5(5)     .       .       .       .   no
 C36     Ru2     C34     C38        -77.7(5)     .       .       .       .   no
 P3      Ru2     P4      C41        -41.5(3)     .       .       .       .   no
 C34     Ru2     P4      C41       -146.3(4)     .       .       .       .   no
 Cl2     Ru2     C37     C36        103.1(5)     .       .       .       .   no
 P3      Ru2     C37     C36       -166.8(4)     .       .       .       .   no
 P4      Ru2     C37     C36         15.6(7)     .       .       .       .   no
 C34     Ru2     C37     C36        -81.0(5)     .       .       .       .   no
 C35     Ru2     C37     C36        -38.2(5)     .       .       .       .   no
 C38     Ru2     C37     C36       -118.0(7)     .       .       .       .   no
 Cl2     Ru2     C37     C38       -138.9(5)     .       .       .       .   no
 C34     Ru2     P4      C55        -23.6(4)     .       .       .       .   no
 C35     Ru2     P4      C55        -55.2(4)     .       .       .       .   no
 C34     Ru2     C37     C38         37.0(5)     .       .       .       .   no
 C35     Ru2     C37     C38         79.8(5)     .       .       .       .   no
 C36     Ru2     C37     C38        118.0(7)     .       .       .       .   no
 C35     Ru2     P3      C49          8.3(5)     .       .       .       .   no
 C34     Ru2     P4      C61         95.8(4)     .       .       .       .   no
 C35     Ru2     P4      C61         64.3(4)     .       .       .       .   no
 Cl2     Ru2     C38     C34        167.5(4)     .       .       .       .   no
 P3      Ru2     C38     C34        -98.0(4)     .       .       .       .   no
 P4      Ru2     C38     C34         14.5(7)     .       .       .       .   no
 C35     Ru2     C38     C34         39.3(5)     .       .       .       .   no
 C36     Ru2     C38     C34         82.0(5)     .       .       .       .   no
 C37     Ru2     C38     C34        119.4(7)     .       .       .       .   no
 Cl2     Ru2     C38     C37         48.1(5)     .       .       .       .   no
 P3      Ru2     C38     C37        142.6(4)     .       .       .       .   no
 P4      Ru2     C38     C37       -104.9(6)     .       .       .       .   no
 C34     Ru2     C38     C37       -119.4(7)     .       .       .       .   no
 C35     Ru2     C38     C37        -80.1(5)     .       .       .       .   no
 C36     Ru2     C38     C37        -37.4(5)     .       .       .       .   no
 Cl2     Ru2     C34     C38        -26.1(8)     .       .       .       .   no
 C38     Ru2     P4      C41       -156.0(5)     .       .       .       .   no
 C37     Ru2     C34     C38        -35.6(4)     .       .       .       .   no
 P3      Ru2     C35     C34         35.2(7)     .       .       .       .   no
 C37     Ru2     P3      C39       -139.4(4)     .       .       .       .   no
 C35     Ru2     P4      C41       -177.8(4)     .       .       .       .   no
 C36     Ru2     P4      C41        146.4(4)     .       .       .       .   no
 C37     Ru2     P4      C41        136.6(5)     .       .       .       .   no
 C38     Ru2     P4      C61         86.1(5)     .       .       .       .   no
 Cl2     Ru2     C35     C34       -142.3(4)     .       .       .       .   no
 C35     Ru2     P3      C43       -109.1(5)     .       .       .       .   no
 C38     Ru2     P3      C43        -49.1(4)     .       .       .       .   no
 Cl2     Ru2     P3      C49       -173.5(3)     .       .       .       .   no
 C36     Ru2     P4      C55        -91.0(4)     .       .       .       .   no
 C37     Ru2     P4      C55       -100.7(5)     .       .       .       .   no
 C34     Ru2     P3      C49         29.6(4)     .       .       .       .   no
 C34     Ru2     P3      C43        -87.8(4)     .       .       .       .   no
 C36     Ru2     P4      C61         28.4(4)     .       .       .       .   no
 C37     Ru2     P3      C43        -22.0(4)     .       .       .       .   no
 P3      Ru2     P4      C55         81.2(3)     .       .       .       .   no
 C38     Ru2     C34     C35        114.1(7)     .       .       .       .   no
 C37     Ru2     P4      C61         18.7(5)     .       .       .       .   no
 C37     Ru2     C34     C35         78.6(6)     .       .       .       .   no
 Cl2     Ru2     P4      C55        170.3(3)     .       .       .       .   no
 C36     Ru2     C34     C35         36.4(6)     .       .       .       .   no
 Cl2     Ru2     C34     C35         88.1(7)     .       .       .       .   no
 P3      Ru2     C34     C35       -155.8(5)     .       .       .       .   no
 P4      Ru2     P3      C49        -86.1(3)     .       .       .       .   no
 P4      Ru2     C34     C35        -58.5(6)     .       .       .       .   no
 Ru1     P1      C6      C9         170.4(5)     .       .       .       .   no
 Ru1     P1      C16     C17         17.1(6)     .       .       .       .   no
 C10     P1      C6      C9          48.2(7)     .       .       .       .   no
 C16     P1      C10     C15        -37.4(8)     .       .       .       .   no
 C6      P1      C16     C17       -111.6(6)     .       .       .       .   no
 Ru1     P1      C10     C15         89.9(7)     .       .       .       .   no
 Ru1     P1      C10     C11        -84.7(7)     .       .       .       .   no
 C16     P1      C6      C9         -59.3(6)     .       .       .       .   no
 C10     P1      C16     C21        -38.6(7)     .       .       .       .   no
 C16     P1      C6      C7          68.5(6)     .       .       .       .   no
 C6      P1      C10     C15       -145.1(7)     .       .       .       .   no
 Ru1     P1      C6      C7         -61.8(6)     .       .       .       .   no
 C6      P1      C16     C21         69.9(7)     .       .       .       .   no
 C10     P1      C6      C7         176.0(6)     .       .       .       .   no
 C16     P1      C10     C11        148.1(7)     .       .       .       .   no
 Ru1     P1      C16     C21       -161.3(6)     .       .       .       .   no
 C6      P1      C10     C11         40.4(8)     .       .       .       .   no
 C10     P1      C16     C17        139.9(6)     .       .       .       .   no
 Ru1     P2      C28     C33       -120.8(6)     .       .       .       .   no
 C8      P2      C28     C29       -172.7(6)     .       .       .       .   no
 Ru1     P2      C22     C23         18.6(8)     .       .       .       .   no
 Ru1     P2      C8      C7          51.9(6)     .       .       .       .   no
 C22     P2      C28     C33        112.3(7)     .       .       .       .   no
 C22     P2      C28     C29        -69.9(6)     .       .       .       .   no
 Ru1     P2      C28     C29         56.9(7)     .       .       .       .   no
 C8      P2      C22     C27         68.5(7)     .       .       .       .   no
 C8      P2      C22     C23       -108.0(7)     .       .       .       .   no
 C28     P2      C22     C23        146.0(7)     .       .       .       .   no
 C8      P2      C28     C33          9.5(7)     .       .       .       .   no
 C22     P2      C8      C7         177.6(5)     .       .       .       .   no
 C28     P2      C8      C7         -78.1(6)     .       .       .       .   no
 C28     P2      C22     C27        -37.5(7)     .       .       .       .   no
 Ru1     P2      C22     C27       -164.9(5)     .       .       .       .   no
 C39     P3      C49     C50         -6.8(7)     .       .       .       .   no
 C49     P3      C39     C42        -62.7(6)     .       .       .       .   no
 C49     P3      C39     C40         70.4(6)     .       .       .       .   no
 Ru2     P3      C49     C50        120.7(5)     .       .       .       .   no
 C49     P3      C43     C48       -153.2(7)     .       .       .       .   no
 Ru2     P3      C49     C54        -59.5(6)     .       .       .       .   no
 C43     P3      C49     C50       -113.0(6)     .       .       .       .   no
 C39     P3      C43     C44        -81.8(7)     .       .       .       .   no
 C39     P3      C43     C48         95.4(7)     .       .       .       .   no
 C43     P3      C49     C54         66.8(6)     .       .       .       .   no
 C39     P3      C49     C54        172.9(5)     .       .       .       .   no
 C43     P3      C39     C42         42.4(6)     .       .       .       .   no
 C43     P3      C39     C40        175.5(6)     .       .       .       .   no
 Ru2     P3      C39     C40        -58.7(6)     .       .       .       .   no
 Ru2     P3      C43     C48        -27.8(8)     .       .       .       .   no
 Ru2     P3      C43     C44        155.0(6)     .       .       .       .   no
 Ru2     P3      C39     C42        168.2(5)     .       .       .       .   no
 C49     P3      C43     C44         29.5(7)     .       .       .       .   no
 C41     P4      C55     C60        -60.3(7)     .       .       .       .   no
 Ru2     P4      C55     C60        169.3(6)     .       .       .       .   no
 C41     P4      C55     C56        116.5(7)     .       .       .       .   no
 C61     P4      C55     C60         45.0(7)     .       .       .       .   no
 C61     P4      C55     C56       -138.3(7)     .       .       .       .   no
 C55     P4      C61     C62         34.3(9)     .       .       .       .   no
 Ru2     P4      C61     C66         80.3(8)     .       .       .       .   no
 C61     P4      C41     C40       -178.3(6)     .       .       .       .   no
 C41     P4      C61     C62        139.6(8)     .       .       .       .   no
 C55     P4      C61     C66       -151.9(8)     .       .       .       .   no
 Ru2     P4      C55     C56        -13.9(8)     .       .       .       .   no
 C55     P4      C41     C40        -72.2(7)     .       .       .       .   no
 Ru2     P4      C41     C40         58.2(7)     .       .       .       .   no
 Ru2     P4      C61     C62        -93.4(8)     .       .       .       .   no
 C41     P4      C61     C66        -46.6(9)     .       .       .       .   no
 C2      C1      C5      Ru1         61.1(6)     .       .       .       .   no
 C2      C1      C5      C4          -0.7(9)     .       .       .       .   no
 C5      C1      C2      Ru1        -59.8(6)     .       .       .       .   no
 Ru1     C1      C5      C4         -61.7(5)     .       .       .       .   no
 C5      C1      C2      C3          0.1(10)     .       .       .       .   no
 Ru1     C1      C2      C3          59.9(6)     .       .       .       .   no
 Ru1     C2      C3      C4          62.3(6)     .       .       .       .   no
 C1      C2      C3      Ru1        -61.8(6)     .       .       .       .   no
 C1      C2      C3      C4          0.5(10)     .       .       .       .   no
 C2      C3      C4      Ru1        -64.5(6)     .       .       .       .   no
 C2      C3      C4      C5          -0.9(9)     .       .       .       .   no
 Ru1     C3      C4      C5          63.6(5)     .       .       .       .   no
 C3      C4      C5      Ru1        -62.6(5)     .       .       .       .   no
 Ru1     C4      C5      C1          63.6(5)     .       .       .       .   no
 C3      C4      C5      C1           1.0(9)     .       .       .       .   no
 C9      C6      C7      C8        -156.8(7)     .       .       .       .   no
 P1      C6      C7      C8          75.1(7)     .       .       .       .   no
 C6      C7      C8      P2         -69.7(7)     .       .       .       .   no
 C11     C10     C15     C14         0.0(13)     .       .       .       .   no
 C15     C10     C11     C12         0.8(13)     .       .       .       .   no
 P1      C10     C11     C12        175.5(7)     .       .       .       .   no
 P1      C10     C15     C14       -174.7(7)     .       .       .       .   no
 C10     C11     C12     C13        -0.9(15)     .       .       .       .   no
 C11     C12     C13     C14         0.1(16)     .       .       .       .   no
 C12     C13     C14     C15         0.7(15)     .       .       .       .   no
 C13     C14     C15     C10        -0.8(13)     .       .       .       .   no
 P1      C16     C21     C20       -178.9(6)     .       .       .       .   no
 C21     C16     C17     C18        -2.7(11)     .       .       .       .   no
 P1      C16     C17     C18        178.8(6)     .       .       .       .   no
 C17     C16     C21     C20         2.6(11)     .       .       .       .   no
 C16     C17     C18     C19         1.1(13)     .       .       .       .   no
 C17     C18     C19     C20         0.6(13)     .       .       .       .   no
 C18     C19     C20     C21        -0.6(13)     .       .       .       .   no
 C19     C20     C21     C16        -1.1(12)     .       .       .       .   no
 P2      C22     C27     C26       -177.4(6)     .       .       .       .   no
 C23     C22     C27     C26        -0.8(12)     .       .       .       .   no
 P2      C22     C23     C24        175.3(6)     .       .       .       .   no
 C27     C22     C23     C24        -1.3(12)     .       .       .       .   no
 C22     C23     C24     C25         1.5(13)     .       .       .       .   no
 C23     C24     C25     C26         0.3(13)     .       .       .       .   no
 C24     C25     C26     C27        -2.3(12)     .       .       .       .   no
 C25     C26     C27     C22         2.6(12)     .       .       .       .   no
 P2      C28     C29     C30       -175.5(6)     .       .       .       .   no
 C33     C28     C29     C30         2.5(12)     .       .       .       .   no
 P2      C28     C33     C32        175.6(6)     .       .       .       .   no
 C29     C28     C33     C32        -2.2(11)     .       .       .       .   no
 C28     C29     C30     C31        -1.8(13)     .       .       .       .   no
 C29     C30     C31     C32         0.9(13)     .       .       .       .   no
 C30     C31     C32     C33        -0.6(14)     .       .       .       .   no
 C31     C32     C33     C28         1.3(13)     .       .       .       .   no
 Ru2     C34     C38     C37         59.9(6)     .       .       .       .   no
 C38     C34     C35     Ru2         65.2(6)     .       .       .       .   no
 C35     C34     C38     C37         -3.5(9)     .       .       .       .   no
 C38     C34     C35     C36          2.2(9)     .       .       .       .   no
 C35     C34     C38     Ru2        -63.4(6)     .       .       .       .   no
 Ru2     C34     C35     C36        -63.0(6)     .       .       .       .   no
 C34     C35     C36     Ru2         62.2(6)     .       .       .       .   no
 Ru2     C35     C36     C37        -62.3(5)     .       .       .       .   no
 C34     C35     C36     C37         -0.1(9)     .       .       .       .   no
 C35     C36     C37     C38         -2.2(9)     .       .       .       .   no
 Ru2     C36     C37     C38        -63.4(6)     .       .       .       .   no
 C35     C36     C37     Ru2         61.2(5)     .       .       .       .   no
 C36     C37     C38     C34         3.6(10)     .       .       .       .   no
 C36     C37     C38     Ru2         62.4(6)     .       .       .       .   no
 Ru2     C37     C38     C34        -58.8(6)     .       .       .       .   no
 C42     C39     C40     C41       -151.7(7)     .       .       .       .   no
 P3      C39     C40     C41         73.9(8)     .       .       .       .   no
 C39     C40     C41     P4         -70.2(8)     .       .       .       .   no
 P3      C43     C44     C45        174.7(6)     .       .       .       .   no
 P3      C43     C48     C47       -175.2(6)     .       .       .       .   no
 C44     C43     C48     C47         2.1(12)     .       .       .       .   no
 C48     C43     C44     C45        -2.6(12)     .       .       .       .   no
 C43     C44     C45     C46         1.4(13)     .       .       .       .   no
 C44     C45     C46     C47         0.2(13)     .       .       .       .   no
 C45     C46     C47     C48        -0.7(13)     .       .       .       .   no
 C46     C47     C48     C43        -0.6(13)     .       .       .       .   no
 C54     C49     C50     C51         1.6(10)     .       .       .       .   no
 P3      C49     C50     C51       -178.7(6)     .       .       .       .   no
 C50     C49     C54     C53        -2.5(10)     .       .       .       .   no
 P3      C49     C54     C53        177.8(6)     .       .       .       .   no
 C49     C50     C51     C52         1.3(11)     .       .       .       .   no
 C50     C51     C52     C53        -3.5(12)     .       .       .       .   no
 C51     C52     C53     C54         2.6(12)     .       .       .       .   no
 C52     C53     C54     C49         0.4(11)     .       .       .       .   no
 P4      C55     C56     C57       -178.1(6)     .       .       .       .   no
 C56     C55     C60     C59         1.2(12)     .       .       .       .   no
 C60     C55     C56     C57        -1.3(12)     .       .       .       .   no
 P4      C55     C60     C59        177.9(6)     .       .       .       .   no
 C55     C56     C57     C58         1.4(12)     .       .       .       .   no
 C56     C57     C58     C59        -1.2(13)     .       .       .       .   no
 C57     C58     C59     C60         1.1(13)     .       .       .       .   no
 C58     C59     C60     C55        -1.0(12)     .       .       .       .   no
 P4      C61     C62     C63        176.9(8)     .       .       .       .   no
 C66     C61     C62     C63         3.1(15)     .       .       .       .   no
 P4      C61     C66     C65       -177.2(8)     .       .       .       .   no
 C62     C61     C66     C65        -3.3(15)     .       .       .       .   no
 C61     C62     C63     C64        -2.0(16)     .       .       .       .   no
 C62     C63     C64     C65         1.1(16)     .       .       .       .   no
 C63     C64     C65     C66        -1.2(16)     .       .       .       .   no
 C64     C65     C66     C61         2.4(16)     .       .       .       .   no
 
loop_
_geom_contact_atom_site_label_1
_geom_contact_atom_site_label_2
_geom_contact_distance
_geom_contact_site_symmetry_1
_geom_contact_site_symmetry_2
_geom_contact_publ_flag
 Ru1     H17          3.1200                     .       .                   no
 Ru1     H23          3.1500                     .       .                   no
 Ru1     H29          3.5800                     .       .                   no
 Ru2     H48          3.1700                     .       .                   no
 Ru2     H54          3.5900                     .       .                   no
 Ru2     H56          3.1200                     .       .                   no
 Cl1     C5         3.523(8)                     .       .                   no
 Cl1     C6         3.457(8)                     .       .                   no
 Cl1     C8         3.640(8)                     .       .                   no
 Cl1     C11        3.501(9)                     .       .                   no
 Cl1     C23        3.528(9)                     .       .                   no
 Cl1     C46        3.566(9)                     .     1_565                 no
 Cl1     C47        3.537(9)                     .     1_565                 no
 Cl1     P2         3.328(3)                     .       .                   no
 Cl1     C1         3.376(9)                     .       .                   no
 Cl1     P1         3.233(3)                     .       .                   no
 Cl2     C66       3.495(10)                     .       .                   no
 Cl2     C24        3.643(9)                     .     1_545                 no
 Cl2     C25        3.565(9)                     .     1_545                 no
 Cl2     P4         3.242(3)                     .       .                   no
 Cl2     C41        3.496(9)                     .       .                   no
 Cl2     C48        3.508(9)                     .       .                   no
 Cl2     P3         3.328(3)                     .       .                   no
 Cl2     C36        3.556(8)                     .       .                   no
 Cl2     C37        3.346(9)                     .       .                   no
 Cl2     C39        3.488(8)                     .       .                   no
 Cl1     H30          2.8400                     .     1_455                 no
 Cl1     H46          2.9800                     .     1_565                 no
 Cl1     H47          2.9300                     .     1_565                 no
 Cl1     H6           2.8100                     .       .                   no
 Cl1     H11          3.0000                     .       .                   no
 Cl1     H23          2.8200                     .       .                   no
 Cl2     H24          3.1100                     .     1_545                 no
 Cl2     H25          2.9600                     .     1_545                 no
 Cl2     H41B         2.9800                     .       .                   no
 Cl2     H48          2.7200                     .       .                   no
 Cl2     H53          2.9000                     .     1_655                 no
 Cl2     H66          2.9000                     .       .                   no
 Cl2     H39          2.8000                     .       .                   no
 P1      C8         3.472(6)                     .       .                   no
 P1      Cl1        3.233(3)                     .       .                   no
 P1      P2         3.259(3)                     .       .                   no
 P1      C5         3.562(9)                     .       .                   no
 P1      C4         3.191(9)                     .       .                   no
 P2      Cl1        3.328(3)                     .       .                   no
 P2      P1         3.259(3)                     .       .                   no
 P2      C2         3.444(9)                     .       .                   no
 P2      C3         3.495(8)                     .       .                   no
 P2      C6         3.444(8)                     .       .                   no
 P3      P4         3.246(3)                     .       .                   no
 P3      Cl2        3.328(3)                     .       .                   no
 P3      C38        3.493(9)                     .       .                   no
 P3      C41        3.503(9)                     .       .                   no
 P3      C34        3.518(8)                     .       .                   no
 P4      C39        3.369(6)                     .       .                   no
 P4      C35        3.197(9)                     .       .                   no
 P4      C36        3.548(9)                     .       .                   no
 P4      P3         3.246(3)                     .       .                   no
 P4      Cl2        3.242(3)                     .       .                   no
 P1      H4A          3.1200                     .       .                   no
 P4      H35A         3.1400                     .       .                   no
 C1      Cl1        3.376(9)                     .       .                   no
 C1      C3        2.273(13)                     .       .                   no
 C1      C4        2.300(14)                     .       .                   no
 C2      P2         3.444(9)                     .       .                   no
 C2      C4        2.302(12)                     .       .                   no
 C2      C19       3.596(12)                     .     2_756                 no
 C2      C5        2.310(11)                     .       .                   no
 C3      C29       3.342(11)                     .       .                   no
 C3      C19       3.440(13)                     .     2_756                 no
 C3      C5        2.315(11)                     .       .                   no
 C3      P2         3.495(8)                     .       .                   no
 C3      C1        2.273(13)                     .       .                   no
 C4      C2        2.302(12)                     .       .                   no
 C4      C1        2.300(14)                     .       .                   no
 C4      C17       3.588(14)                     .       .                   no
 C4      P1         3.191(9)                     .       .                   no
 C5      C2        2.310(11)                     .       .                   no
 C5      C42        3.433(8)                     .     2_656                 no
 C5      C3        2.315(11)                     .       .                   no
 C5      P1         3.562(9)                     .       .                   no
 C5      Cl1        3.523(8)                     .       .                   no
 C7      C33       3.436(11)                     .       .                   no
 C9      C21       3.260(12)                     .       .                   no
 C9      C42       3.597(12)                     .       .                   no
 C9      C11       3.350(12)                     .       .                   no
 C11     Cl1        3.501(9)                     .       .                   no
 C11     C9        3.350(12)                     .       .                   no
 C15     C21       3.218(11)                     .       .                   no
 C17     C4        3.588(14)                     .       .                   no
 C17     C28       3.549(11)                     .       .                   no
 C19     C51       3.541(11)                     .     1_655                 no
 C19     C2        3.596(12)                     .     2_746                 no
 C19     C3        3.440(13)                     .     2_746                 no
 C21     C15       3.218(11)                     .       .                   no
 C21     C9        3.260(12)                     .       .                   no
 C23     Cl1        3.528(9)                     .       .                   no
 C24     Cl2        3.643(9)                     .     1_565                 no
 C25     Cl2        3.565(9)                     .     1_565                 no
 C27     C29       3.596(11)                     .       .                   no
 C28     C17       3.549(11)                     .       .                   no
 C29     C27       3.596(11)                     .       .                   no
 C29     C3        3.342(11)                     .       .                   no
 C30     C64       3.579(13)                     .     2_757                 no
 C32     C58       3.518(12)                     .     1_655                 no
 C32     C59       3.595(11)                     .     1_655                 no
 C33     C7        3.436(11)                     .       .                   no
 C34     P3         3.518(8)                     .       .                   no
 C34     C58       3.394(14)                     .     2_547                 no
 C34     C54       3.351(10)                     .       .                   no
 C34     C37       2.315(12)                     .       .                   no
 C34     C36       2.334(11)                     .       .                   no
 C35     C38       2.293(12)                     .       .                   no
 C35     P4         3.197(9)                     .       .                   no
 C35     C56       3.579(14)                     .       .                   no
 C35     C37       2.280(13)                     .       .                   no
 C36     Cl2        3.556(8)                     .       .                   no
 C36     C38       2.314(11)                     .       .                   no
 C36     C34       2.334(11)                     .       .                   no
 C36     P4         3.548(9)                     .       .                   no
 C37     Cl2        3.346(9)                     .       .                   no
 C37     C34       2.315(12)                     .       .                   no
 C37     C35       2.280(13)                     .       .                   no
 C38     P3         3.493(9)                     .       .                   no
 C38     C58       3.580(13)                     .     2_547                 no
 C38     C36       2.314(11)                     .       .                   no
 C38     C35       2.293(12)                     .       .                   no
 C40     C50       3.468(11)                     .       .                   no
 C42     C44       3.255(11)                     .       .                   no
 C42     C9        3.597(12)                     .       .                   no
 C42     C50       3.436(11)                     .       .                   no
 C42     C5         3.433(8)                     .     2_646                 no
 C44     C42       3.255(11)                     .       .                   no
 C44     C54       3.410(10)                     .       .                   no
 C46     Cl1        3.566(9)                     .     1_545                 no
 C47     Cl1        3.537(9)                     .     1_545                 no
 C48     Cl2        3.508(9)                     .       .                   no
 C49     C56       3.494(11)                     .       .                   no
 C50     C42       3.436(11)                     .       .                   no
 C50     C40       3.468(11)                     .       .                   no
 C50     C56       3.595(10)                     .       .                   no
 C51     C19       3.541(11)                     .     1_455                 no
 C54     C44       3.410(10)                     .       .                   no
 C54     C34       3.351(10)                     .       .                   no
 C56     C35       3.579(14)                     .       .                   no
 C56     C50       3.595(10)                     .       .                   no
 C56     C49       3.494(11)                     .       .                   no
 C58     C34       3.394(14)                     .     2_557                 no
 C58     C32       3.518(12)                     .     1_455                 no
 C58     C38       3.580(13)                     .     2_557                 no
 C59     C32       3.595(11)                     .     1_455                 no
 C60     C62       3.254(13)                     .       .                   no
 C62     C60       3.254(13)                     .       .                   no
 C64     C30       3.579(13)                     .     2_747                 no
 C66     Cl2       3.495(10)                     .       .                   no
 C1      H2A          2.0900                     .       .                   no
 C1      H5A          2.1600                     .       .                   no
 C2      H29          2.9200                     .       .                   no
 C2      H1A          2.0900                     .       .                   no
 C2      H19          3.0800                     .     2_756                 no
 C2      H3A          2.1100                     .       .                   no
 C3      H4A          2.1500                     .       .                   no
 C3      H19          2.7200                     .     2_756                 no
 C3      H29          2.8100                     .       .                   no
 C3      H2A          2.1000                     .       .                   no
 C3      H17          2.8900                     .       .                   no
 C4      H3A          2.1500                     .       .                   no
 C4      H5A          2.1300                     .       .                   no
 C4      H19          2.8200                     .     2_756                 no
 C5      H4A          2.1200                     .       .                   no
 C5      H1A          2.1500                     .       .                   no
 C5      H42A         3.1000                     .     2_656                 no
 C6      H11          2.8500                     .       .                   no
 C7      H31          3.1000                     .     1_455                 no
 C7      H33          2.8000                     .       .                   no
 C8      H33          2.6800                     .       .                   no
 C9      H40B         2.9100                     .       .                   no
 C9      H11          3.0900                     .       .                   no
 C9      H42A         2.9400                     .       .                   no
 C9      H21          2.8300                     .       .                   no
 C10     H9C          2.6900                     .       .                   no
 C10     H21          2.8600                     .       .                   no
 C11     H6           3.0000                     .       .                   no
 C11     H9C          2.6400                     .       .                   no
 C13     H1A          3.0500                     .     2_646                 no
 C14     H1A          2.9600                     .     2_646                 no
 C15     H21          2.8900                     .       .                   no
 C15     H1A          3.0000                     .     2_646                 no
 C16     H7A          2.8400                     .       .                   no
 C16     H9B          2.8900                     .       .                   no
 C16     H15          2.7500                     .       .                   no
 C17     H51          3.0600                     .     1_655                 no
 C18     H51          2.9900                     .     1_655                 no
 C19     H51          3.1000                     .     1_655                 no
 C20     H46          3.0100                     .     2_656                 no
 C21     H15          2.8100                     .       .                   no
 C21     H9B          2.6100                     .       .                   no
 C25     H38A         3.0300                     .     1_665                 no
 C25     H62          2.9500                     .     2_657                 no
 C26     H38A         2.9700                     .     1_665                 no
 C26     H65          3.0800                     .     2_757                 no
 C26     H62          2.8100                     .     2_657                 no
 C27     H65          3.0600                     .     2_757                 no
 C27     H8A          3.0700                     .       .                   no
 C28     H17          2.8000                     .       .                   no
 C28     H27          2.7400                     .       .                   no
 C29     H64          2.9700                     .     2_757                 no
 C29     H17          3.0700                     .       .                   no
 C29     H3A          2.7400                     .       .                   no
 C30     H6           3.0200                     .     1_655                 no
 C30     H64          2.9900                     .     2_757                 no
 C31     H6           3.0600                     .     1_655                 no
 C33     H7A          2.7900                     .       .                   no
 C33     H8A          2.8600                     .       .                   no
 C34     H58          2.7000                     .     2_547                 no
 C34     H54          2.8400                     .       .                   no
 C34     H56          2.8300                     .       .                   no
 C34     H35A         2.1100                     .       .                   no
 C34     H38A         2.1500                     .       .                   no
 C35     H56          3.1000                     .       .                   no
 C35     H58          2.7500                     .     2_547                 no
 C35     H34A         2.1300                     .       .                   no
 C35     H36A         2.1300                     .       .                   no
 C36     H37A         2.1300                     .       .                   no
 C36     H35A         2.1100                     .       .                   no
 C37     H60          3.1000                     .     2_647                 no
 C37     H36A         2.1400                     .       .                   no
 C37     H38A         2.1100                     .       .                   no
 C38     H34A         2.1600                     .       .                   no
 C38     H54          2.9900                     .       .                   no
 C38     H37A         2.1000                     .       .                   no
 C38     H58          3.0800                     .     2_547                 no
 C39     H50          2.8200                     .       .                   no
 C40     H50          2.8300                     .       .                   no
 C40     H52          3.0900                     .     1_655                 no
 C40     H9A          2.9900                     .       .                   no
 C41     H66          2.8300                     .       .                   no
 C42     H50          2.8700                     .       .                   no
 C42     H9A          3.0900                     .       .                   no
 C42     H5A          2.9800                     .     2_646                 no
 C43     H42C         2.5900                     .       .                   no
 C43     H54          3.0900                     .       .                   no
 C44     H42C         2.5500                     .       .                   no
 C45     H15          3.0500                     .     2_646                 no
 C45     H2A          2.9600                     .     1_445                 no
 C46     H2A          3.0500                     .     1_445                 no
 C46     H15          3.0700                     .     2_646                 no
 C47     H63          3.0100                     .     2_647                 no
 C49     H40A         3.1000                     .       .                   no
 C49     H56          2.7900                     .       .                   no
 C49     H44          2.6300                     .       .                   no
 C50     H42B         2.8000                     .       .                   no
 C50     H40A         2.7700                     .       .                   no
 C53     H13          2.9800                     .     2_546                 no
 C54     H44          3.0300                     .       .                   no
 C54     H56          3.0700                     .       .                   no
 C54     H13          3.0700                     .     2_546                 no
 C54     H34A         2.7500                     .       .                   no
 C55     H62          2.7700                     .       .                   no
 C55     H40A         2.8800                     .       .                   no
 C58     H32          3.0700                     .     1_455                 no
 C59     H25          3.0600                     .     2_647                 no
 C60     H41A         2.9500                     .       .                   no
 C60     H62          2.8900                     .       .                   no
 C61     H37A         3.0100                     .     2_657                 no
 C61     H60          2.9200                     .       .                   no
 C62     H60          3.0000                     .       .                   no
 C62     H37A         2.9100                     .     2_657                 no
 C63     H37A         2.9400                     .     2_657                 no
 C64     H37A         3.1000                     .     2_657                 no
 C66     H41B         2.8800                     .       .                   no
 H1A     C13          3.0500                     .     2_656                 no
 H1A     C14          2.9600                     .     2_656                 no
 H1A     C15          3.0000                     .     2_656                 no
 H2A     H29          2.5600                     .       .                   no
 H2A     C45          2.9600                     .     1_665                 no
 H2A     C46          3.0500                     .     1_665                 no
 H3A     H17          2.4700                     .       .                   no
 H3A     C29          2.7400                     .       .                   no
 H3A     H29          2.3400                     .       .                   no
 H4A     H15          2.5800                     .       .                   no
 H5A     C42          2.9800                     .     2_656                 no
 H5A     H42A         2.4400                     .     2_656                 no
 H6      C11          3.0000                     .       .                   no
 H6      C30          3.0200                     .     1_455                 no
 H6      Cl1          2.8100                     .       .                   no
 H6      H8B          2.4500                     .       .                   no
 H6      H11          2.3700                     .       .                   no
 H6      C31          3.0600                     .     1_455                 no
 H6      H30          2.5600                     .     1_455                 no
 H7A     H33          2.2100                     .       .                   no
 H7A     H51          2.4800                     .     1_655                 no
 H7A     C33          2.7900                     .       .                   no
 H7A     C16          2.8400                     .       .                   no
 H7B     H9A          2.4000                     .       .                   no
 H7B     H40B         2.5200                     .       .                   no
 H8A     C27          3.0700                     .       .                   no
 H8A     C33          2.8600                     .       .                   no
 H8A     H33          2.2900                     .       .                   no
 H8B     H6           2.4500                     .       .                   no
 H9A     H40B         2.1500                     .       .                   no
 H9A     C40          2.9900                     .       .                   no
 H9A     C42          3.0900                     .       .                   no
 H9A     H7B          2.4000                     .       .                   no
 H9B     H21          2.2600                     .       .                   no
 H9B     H42A         2.4800                     .       .                   no
 H9B     C21          2.6100                     .       .                   no
 H9B     C16          2.8900                     .       .                   no
 H9C     C11          2.6400                     .       .                   no
 H9C     H11          2.5000                     .       .                   no
 H9C     C10          2.6900                     .       .                   no
 H11     C9           3.0900                     .       .                   no
 H11     Cl1          3.0000                     .       .                   no
 H11     C6           2.8500                     .       .                   no
 H11     H9C          2.5000                     .       .                   no
 H11     H6           2.3700                     .       .                   no
 H12     H45          2.5600                     .     2_556                 no
 H13     C53          2.9800                     .     2_556                 no
 H13     C54          3.0700                     .     2_556                 no
 H14     H24          2.5100                     .     2_646                 no
 H15     C16          2.7500                     .       .                   no
 H15     C45          3.0500                     .     2_656                 no
 H15     C46          3.0700                     .     2_656                 no
 H15     C21          2.8100                     .       .                   no
 H15     H4A          2.5800                     .       .                   no
 H17     Ru1          3.1200                     .       .                   no
 H17     C29          3.0700                     .       .                   no
 H17     C3           2.8900                     .       .                   no
 H17     C28          2.8000                     .       .                   no
 H17     H3A          2.4700                     .       .                   no
 H19     C2           3.0800                     .     2_746                 no
 H19     C3           2.7200                     .     2_746                 no
 H19     C4           2.8200                     .     2_746                 no
 H21     C9           2.8300                     .       .                   no
 H21     C10          2.8600                     .       .                   no
 H21     C15          2.8900                     .       .                   no
 H21     H9B          2.2600                     .       .                   no
 H23     Ru1          3.1500                     .       .                   no
 H23     Cl1          2.8200                     .       .                   no
 H24     H14          2.5100                     .     2_656                 no
 H24     Cl2          3.1100                     .     1_565                 no
 H25     Cl2          2.9600                     .     1_565                 no
 H25     C59          3.0600                     .     2_657                 no
 H26     H65          2.5400                     .     2_757                 no
 H27     C28          2.7400                     .       .                   no
 H27     H65          2.5200                     .     2_757                 no
 H29     C2           2.9200                     .       .                   no
 H29     C3           2.8100                     .       .                   no
 H29     Ru1          3.5800                     .       .                   no
 H29     H3A          2.3400                     .       .                   no
 H29     H2A          2.5600                     .       .                   no
 H30     Cl1          2.8400                     .     1_655                 no
 H30     H6           2.5600                     .     1_655                 no
 H31     C7           3.1000                     .     1_655                 no
 H32     H40A         2.5100                     .     1_655                 no
 H32     C58          3.0700                     .     1_655                 no
 H33     C7           2.8000                     .       .                   no
 H33     H8A          2.2900                     .       .                   no
 H33     C8           2.6800                     .       .                   no
 H33     H7A          2.2100                     .       .                   no
 H34A    C54          2.7500                     .       .                   no
 H34A    H54          2.3600                     .       .                   no
 H34A    H56          2.4100                     .       .                   no
 H37A    C61          3.0100                     .     2_647                 no
 H37A    C62          2.9100                     .     2_647                 no
 H37A    C63          2.9400                     .     2_647                 no
 H37A    C64          3.1000                     .     2_647                 no
 H37A    H60          2.5300                     .     2_647                 no
 H38A    C25          3.0300                     .     1_445                 no
 H38A    C26          2.9700                     .     1_445                 no
 H39     Cl2          2.8000                     .       .                   no
 H39     H41B         2.3700                     .       .                   no
 H39     H53          2.5700                     .     1_655                 no
 H40A    C49          3.1000                     .       .                   no
 H40A    C50          2.7700                     .       .                   no
 H40A    C55          2.8800                     .       .                   no
 H40A    H32          2.5100                     .     1_455                 no
 H40A    H50          2.1500                     .       .                   no
 H40B    C9           2.9100                     .       .                   no
 H40B    H7B          2.5200                     .       .                   no
 H40B    H9A          2.1500                     .       .                   no
 H40B    H42A         2.3800                     .       .                   no
 H40B    H52          2.5700                     .     1_655                 no
 H41A    C60          2.9500                     .       .                   no
 H41A    H60          2.5800                     .       .                   no
 H41B    Cl2          2.9800                     .       .                   no
 H41B    C66          2.8800                     .       .                   no
 H41B    H39          2.3700                     .       .                   no
 H41B    H66          2.2700                     .       .                   no
 H42A    C9           2.9400                     .       .                   no
 H42A    H9B          2.4800                     .       .                   no
 H42A    H40B         2.3800                     .       .                   no
 H42A    C5           3.1000                     .     2_646                 no
 H42A    H5A          2.4400                     .     2_646                 no
 H42B    C50          2.8000                     .       .                   no
 H42B    H50          2.1700                     .       .                   no
 H42C    C43          2.5900                     .       .                   no
 H42C    C44          2.5500                     .       .                   no
 H44     C49          2.6300                     .       .                   no
 H44     C54          3.0300                     .       .                   no
 H45     H12          2.5600                     .     2_546                 no
 H46     Cl1          2.9800                     .     1_545                 no
 H46     C20          3.0100                     .     2_646                 no
 H47     Cl1          2.9300                     .     1_545                 no
 H47     H63          2.3400                     .     2_647                 no
 H48     Ru2          3.1700                     .       .                   no
 H48     Cl2          2.7200                     .       .                   no
 H50     C39          2.8200                     .       .                   no
 H50     C40          2.8300                     .       .                   no
 H50     C42          2.8700                     .       .                   no
 H50     H40A         2.1500                     .       .                   no
 H50     H42B         2.1700                     .       .                   no
 H51     C17          3.0600                     .     1_455                 no
 H51     C18          2.9900                     .     1_455                 no
 H51     C19          3.1000                     .     1_455                 no
 H51     H7A          2.4800                     .     1_455                 no
 H52     C40          3.0900                     .     1_455                 no
 H52     H40B         2.5700                     .     1_455                 no
 H53     Cl2          2.9000                     .     1_455                 no
 H53     H39          2.5700                     .     1_455                 no
 H54     Ru2          3.5900                     .       .                   no
 H54     C34          2.8400                     .       .                   no
 H54     C38          2.9900                     .       .                   no
 H54     C43          3.0900                     .       .                   no
 H54     H34A         2.3600                     .       .                   no
 H56     Ru2          3.1200                     .       .                   no
 H56     C34          2.8300                     .       .                   no
 H56     C35          3.1000                     .       .                   no
 H56     C49          2.7900                     .       .                   no
 H56     C54          3.0700                     .       .                   no
 H56     H34A         2.4100                     .       .                   no
 H58     C34          2.7000                     .     2_557                 no
 H58     C35          2.7500                     .     2_557                 no
 H58     C38          3.0800                     .     2_557                 no
 H60     C61          2.9200                     .       .                   no
 H60     C62          3.0000                     .       .                   no
 H60     H41A         2.5800                     .       .                   no
 H60     C37          3.1000                     .     2_657                 no
 H60     H37A         2.5300                     .     2_657                 no
 H62     C55          2.7700                     .       .                   no
 H62     C60          2.8900                     .       .                   no
 H62     C25          2.9500                     .     2_647                 no
 H62     C26          2.8100                     .     2_647                 no
 H63     C47          3.0100                     .     2_657                 no
 H63     H47          2.3400                     .     2_657                 no
 H64     C29          2.9700                     .     2_747                 no
 H64     C30          2.9900                     .     2_747                 no
 H65     C26          3.0800                     .     2_747                 no
 H65     C27          3.0600                     .     2_747                 no
 H65     H26          2.5400                     .     2_747                 no
 H65     H27          2.5200                     .     2_747                 no
 H66     Cl2          2.9000                     .       .                   no
 H66     C41          2.8300                     .       .                   no
 H66     H41B         2.2700                     .       .                   no
 
loop_
_geom_hbond_atom_site_label_D
_geom_hbond_atom_site_label_H
_geom_hbond_atom_site_label_A
_geom_hbond_distance_DH
_geom_hbond_distance_HA
_geom_hbond_distance_DA
_geom_hbond_angle_DHA
_geom_hbond_site_symmetry_A
_geom_hbond_publ_flag

C6      H6      Cl1         1.0000     2.8100   3.457(8)     123.00     .   yes
C23     H23     Cl1         0.9500     2.8200   3.528(9)     132.00     .   yes
C39     H39     Cl2         1.0000     2.8000   3.488(8)     126.00     .   yes
C48     H48     Cl2         0.9500     2.7200   3.508(9)     141.00     .   yes
 

 
#===END
